# Supplementary material for: Designing highly efficient Rh/CPOL-bp&PPh3 heterogenous catalysts for hydroformylation of internal and terminal olefins
Source: Royal Society of Chemistry journal article supplement (doi:10.1039/c5cy01655j), 2015-10-30

## Designing highly efficient Rh/CPOL-bp&PPh<sub>3</sub> heterogenous catalysts for hydroformylation of internal and terminal olefins

Cunyao Li,<sup>ac</sup> Kai Xiong,<sup>d</sup> Li Yan,<sup>\*b</sup> Miao Jiang<sup>ac</sup>, Xiangen Song<sup>a</sup>, Tao Wang<sup>ac</sup>, Xingkun Chen<sup>ac</sup>, Zhuangping Zhan<sup>d</sup> and Yunjie Ding<sup>\*ab</sup>

<sup>a</sup>Dalian National Laboratory for Clean Energy, Dalian, 116023, P. R. China

<sup>b</sup>State Key Laboratory of catalysis, Dalian Institute of Chemical Physics, Chinese Academy of Sciences, Dalian, 116023, P. R. China

<sup>c</sup>University of Chinese Academy of Sciences, Beijing 100039, P. R. China

<sup>d</sup>Department of Chemistry, College of Chemistry and Chemical Engineering, Xiamen University, Xiamen 361005, P. R. China

---

|                                                         |        |
|---------------------------------------------------------|--------|
| 1. SUPPORTING FIGURES .....                             | - 3 -  |
| 2. SUPPORTING TABLES .....                              | - 15 - |
| 3. NMR CHARACTERIZATIONS OF COMPOUNDS IN SCHEME 1 ..... | - 16 - |

## 1. Supporting Figures

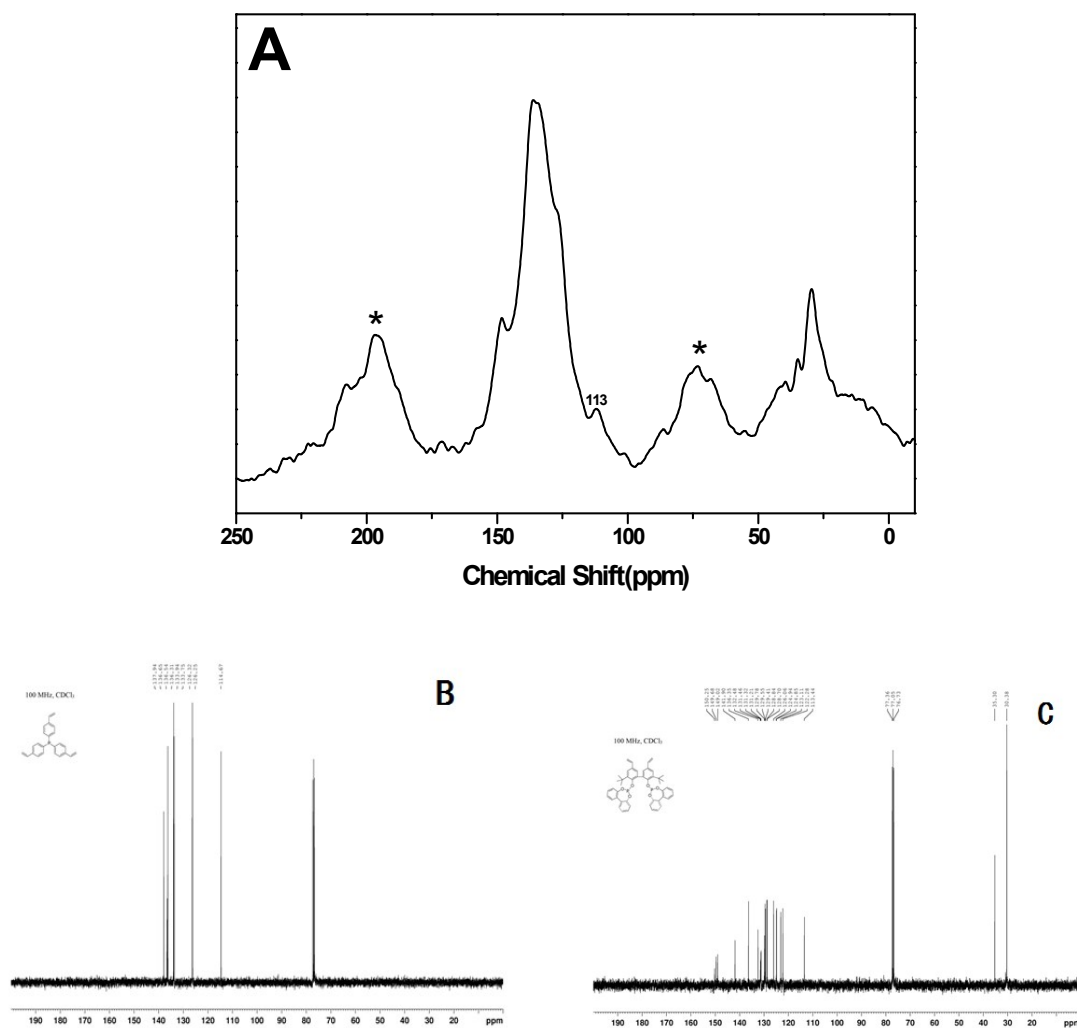

**Figure S1.** (A)  $^{13}\text{C}$  MAS NMR spectrum of CPOL-bp&PPh<sub>3</sub>, (B)  $^{13}\text{C}$  NMR spectrum of tris(4-vinylphenyl)phosphane and (C)  $^{13}\text{C}$  NMR spectrum of vinyl biphenos.

The peaks at 113 ppm in CPOL-bp&PPh<sub>3</sub>, which can be assigned to unpolymerized vinyl groups, is quite small compared with the corresponding monomers (B, C), indicating that CPOL-bp&PPh<sub>3</sub> has high degree of polymerization. The peaks at \* are side bands.

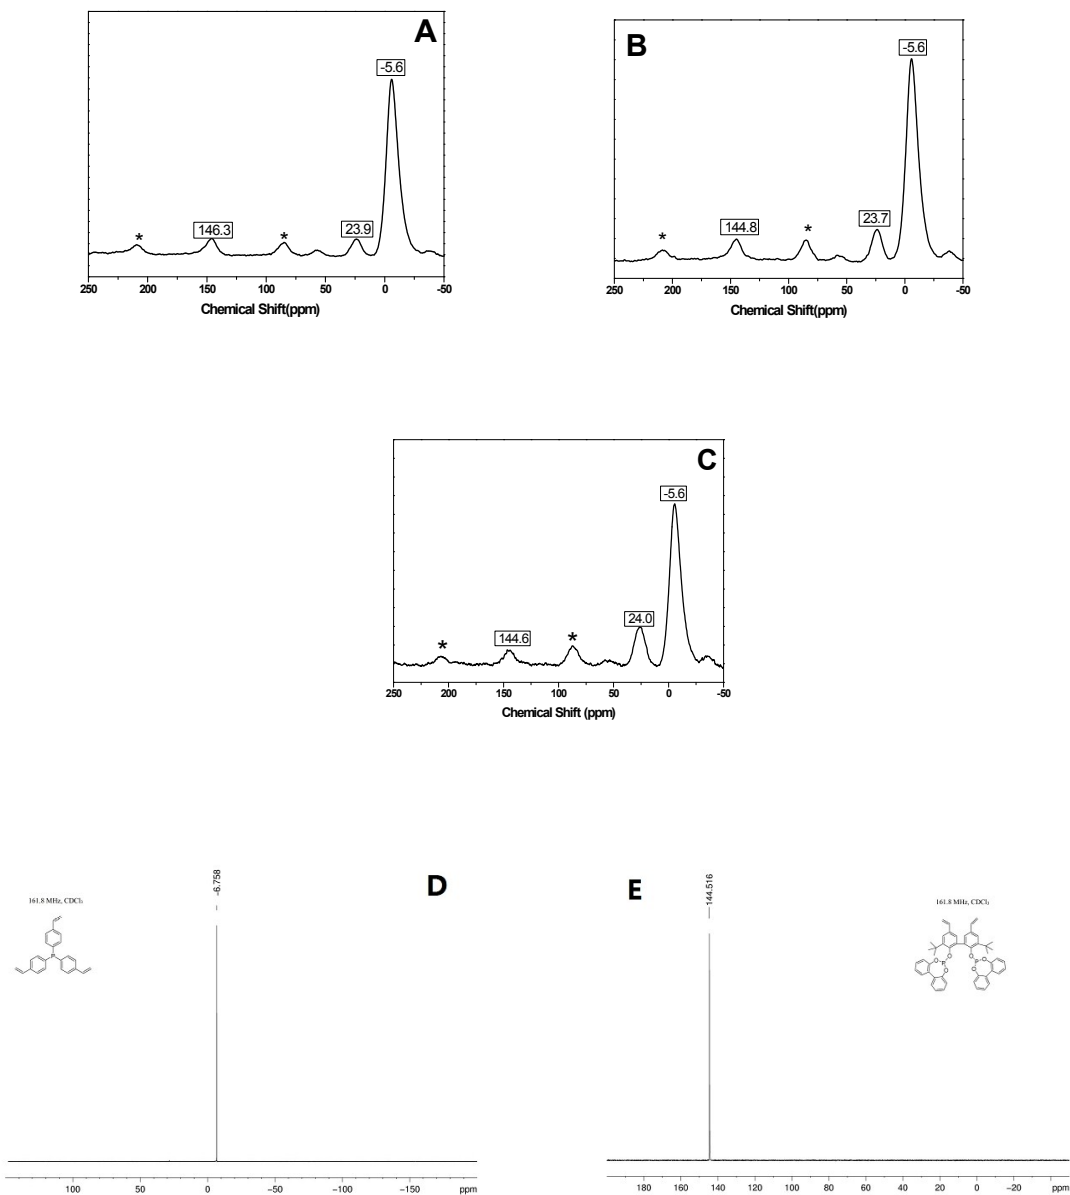

**Figure S2.**  $^{31}\text{P}$  MAS NMR spectra of (A) CPOL-bp&PPh<sub>3</sub>, (B) 0.14 % wt Rh/CPOL-bp&PPh<sub>3</sub> and (C) 2.0 % wt Rh/CPOL-bp&PPh<sub>3</sub>,  $^{31}\text{P}$  NMR spectra of (D) tris(4-vinylphenyl)phosphane and (E) vinyl biphenos.

The peaks at \* are side bands. The  $^{31}\text{P}$  MAS NMR spectrum of fresh CPOL-bp&PPh<sub>3</sub> exhibits an additional small peak at 23.9 ppm corresponding to an oxidation state of phosphorus (P=O), which indicates that slight oxidation of P atom took place during the polymerization. Remarkably, the  $^{31}\text{P}$  MAS NMR spectrum of fresh 0.14 % wt Rh/CPOL-bp&PPh<sub>3</sub> shows that the peak at 23.7 ppm could be assigned to both oxidation state of phosphorus (P=O) and those PPh<sub>3</sub> coordinated with Rh as well. 2.0 % wt Rh/CPOL-bp&PPh<sub>3</sub> shows higher peak at 24.0 ppm than 0.14 % wt Rh/CPOL-bp&PPh<sub>3</sub>, indicating more PPh<sub>3</sub> units are coordinated with Rh. Besides, compared with the peak at 146.3 ppm in CPOL-bp&PPh<sub>3</sub>, 0.14% wt Rh/CPOL-bp&PPh<sub>3</sub> gives relatively low-field peak at 144.8 ppm, 2.0 % wt Rh/CPOL-bp&PPh<sub>3</sub> gives relatively low-field peak at 144.6 ppm. The low-field shift can be ascribed to the biphenos units coordinated with Rh.

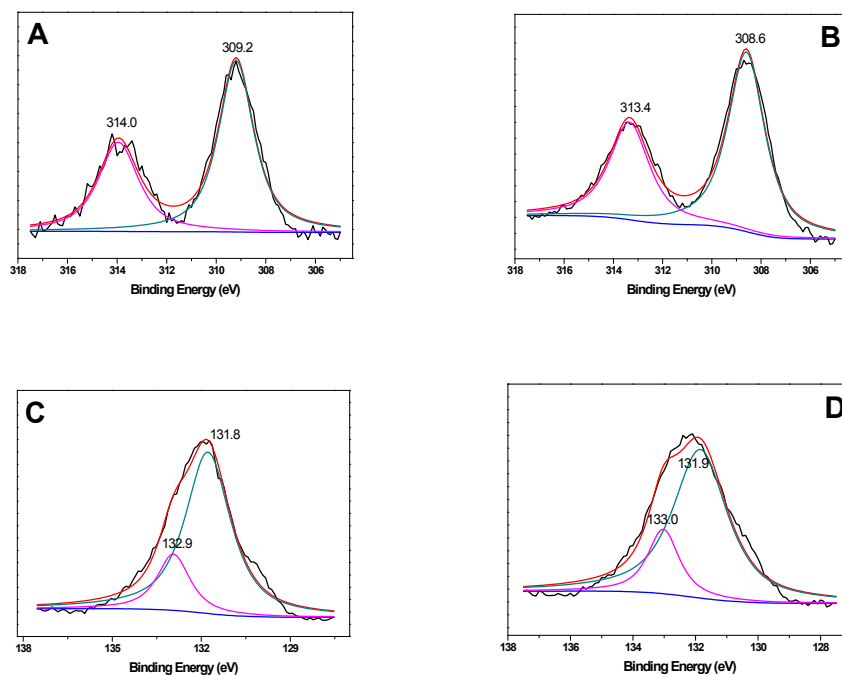

**Figure S3.** (A) Rh3d XPS spectra of Rh(CO)<sub>2</sub>(acac), (B) Rh3d XPS spectra of 0.14% Rh/CPOL-bp&PPh<sub>3</sub>, (C) P2p XPS spectra of CPOL-bp&PPh<sub>3</sub>, (E) P2p XPS spectra of 0.14% Rh/CPOL-bp&PPh<sub>3</sub>.

XPS of Rh(CO)<sub>2</sub>(acac) shows the binding energies of Rh3d<sub>3/2</sub> and Rh3d<sub>5/2</sub> at 314.0 eV and 309.2 eV respectively. In 0.14% Rh/CPOL-bp&PPh<sub>3</sub> catalyst, the binding energies of Rh3d<sub>3/2</sub> and Rh3d<sub>5/2</sub> decrease to 313.4 eV and 308.6 eV, showing the successful coordination of Rh(CO)<sub>2</sub>acac with CPOL-bp&PPh<sub>3</sub> carrier. Interestingly, compared with XPS spectra of P2p in CPOL-bp&PPh<sub>3</sub> (two kinds of P species: PPh<sub>3</sub> units at 131.8 eV, biphphos units at 132.9 eV), 0.14% Rh/CPOL-bp&PPh<sub>3</sub> give relatively higher binding energy (131.9 eV, 133.0 eV), indicating the successful coordination of Rh with two kinds of P species in the polymer skeleton.

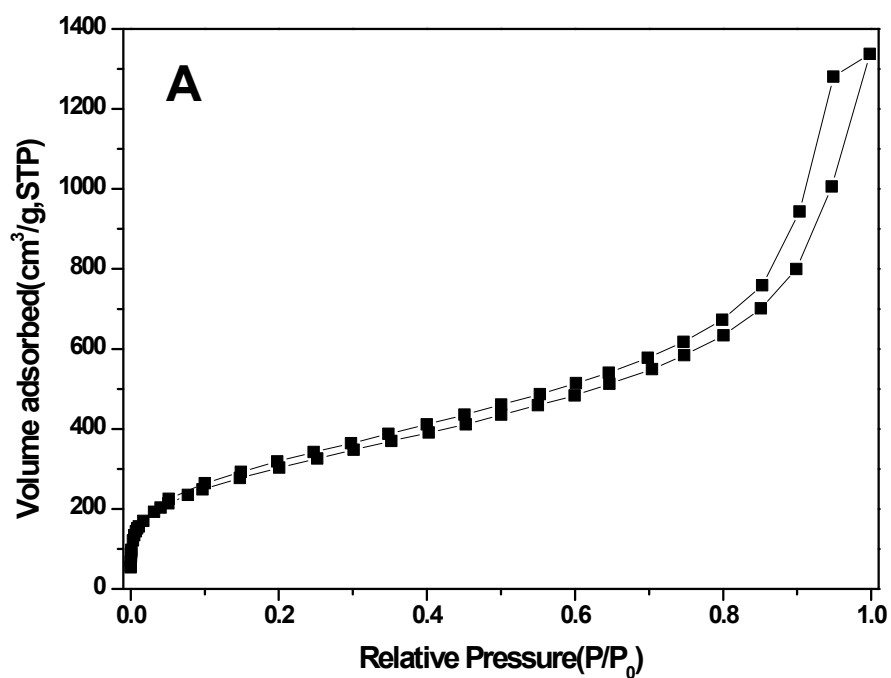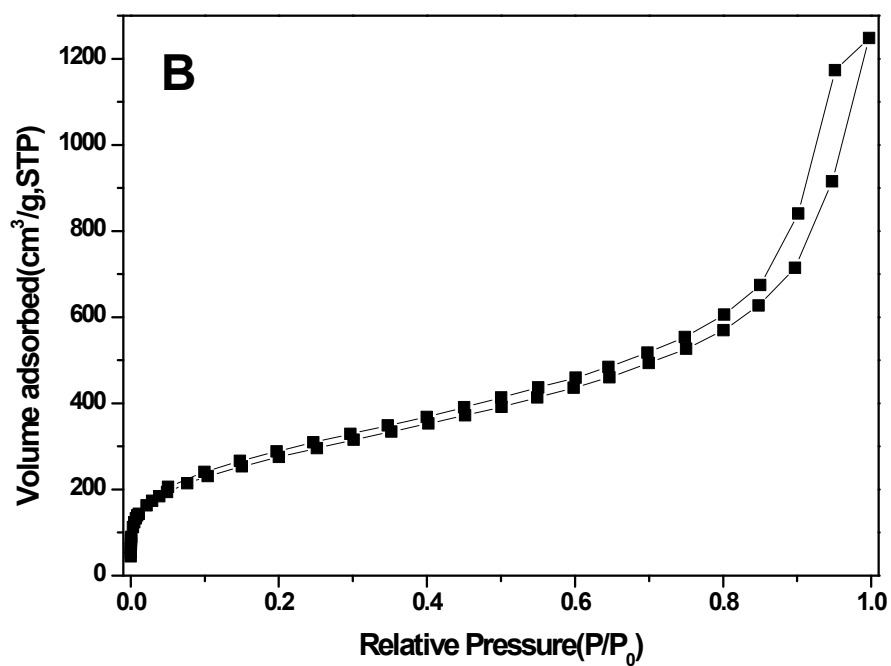

Figure S4. Nitrogen sorption isotherms of (A) CPOL-bp&PPh<sub>3</sub> and (B) Rh/CPOL-bp&PPh<sub>3</sub>.

Figure S4 indicates that N<sub>2</sub> sorption isotherm of both CPOL-bp&PPh<sub>3</sub> and Rh/CPOL-bp&PPh<sub>3</sub> give the curve of type-I plus type-IV, showing that the two samples possess both micropores and mesoporous.

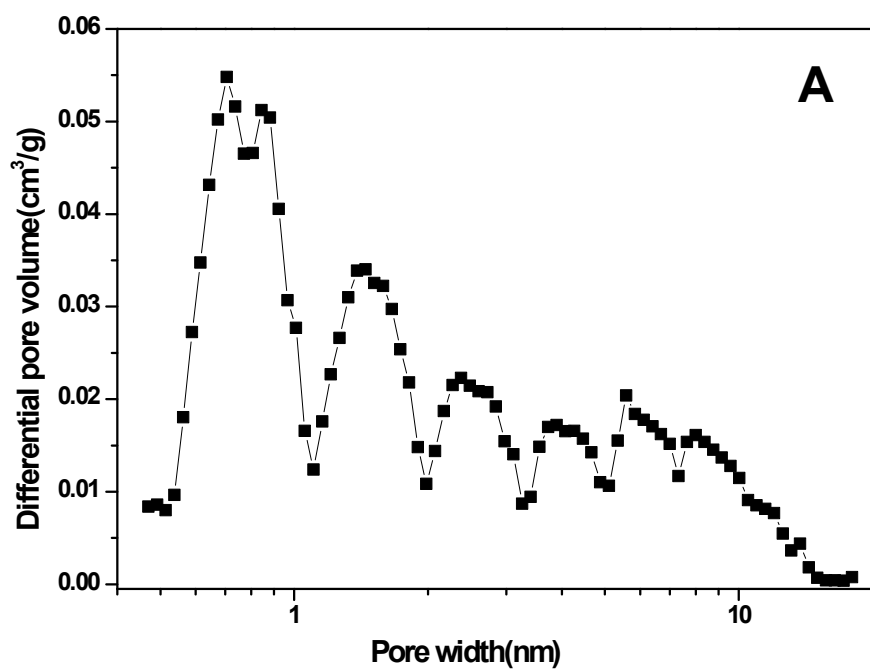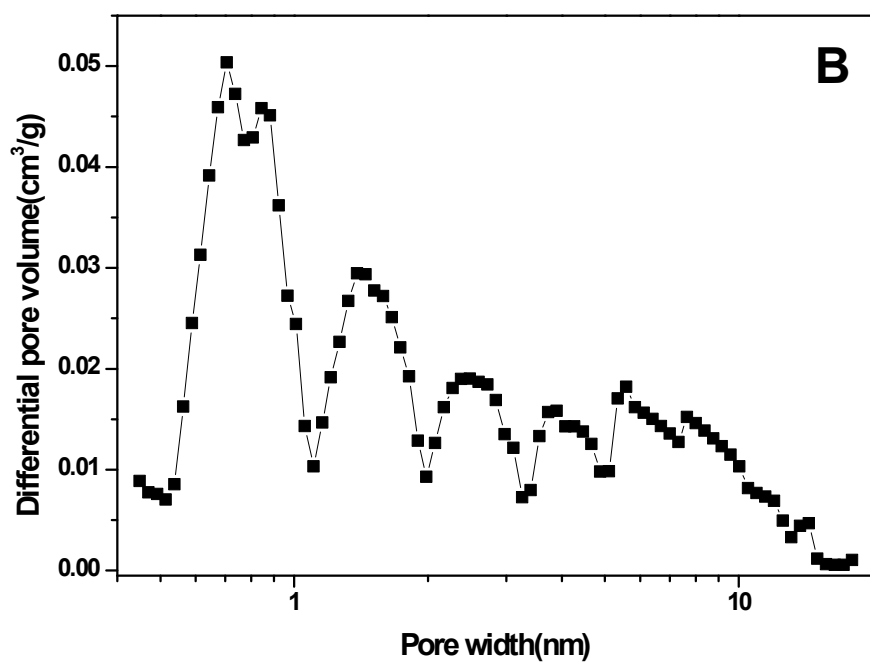

Figure S5. Pore size distribution of (A) CPOL-bp&PPh<sub>3</sub> and (B) Rh/CPOL-bp&PPh<sub>3</sub>.

Pore size distribution is calculated from non-local density functional theory (NLDFT). Figure S5 indicates that both CPOL-bp&PPh<sub>3</sub> and Rh/CPOL-bp&PPh<sub>3</sub> possess hierarchical porosity.

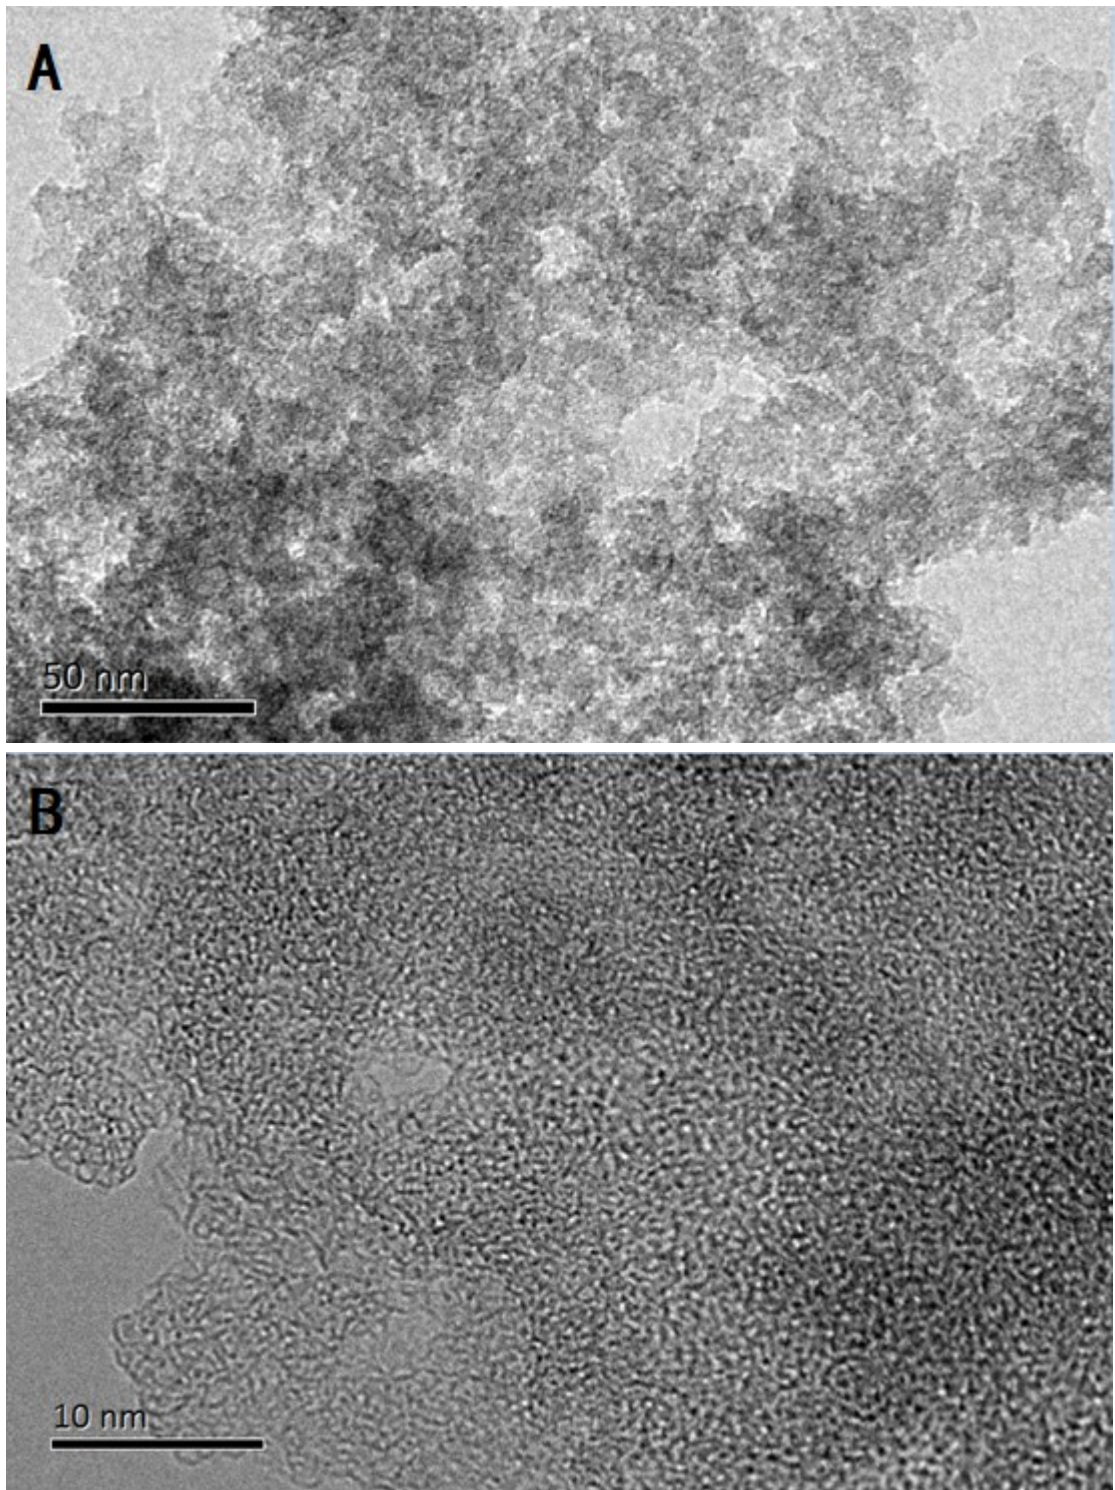

**Figure S6.** TEM images of CPOL-bp&PPh<sub>3</sub>.



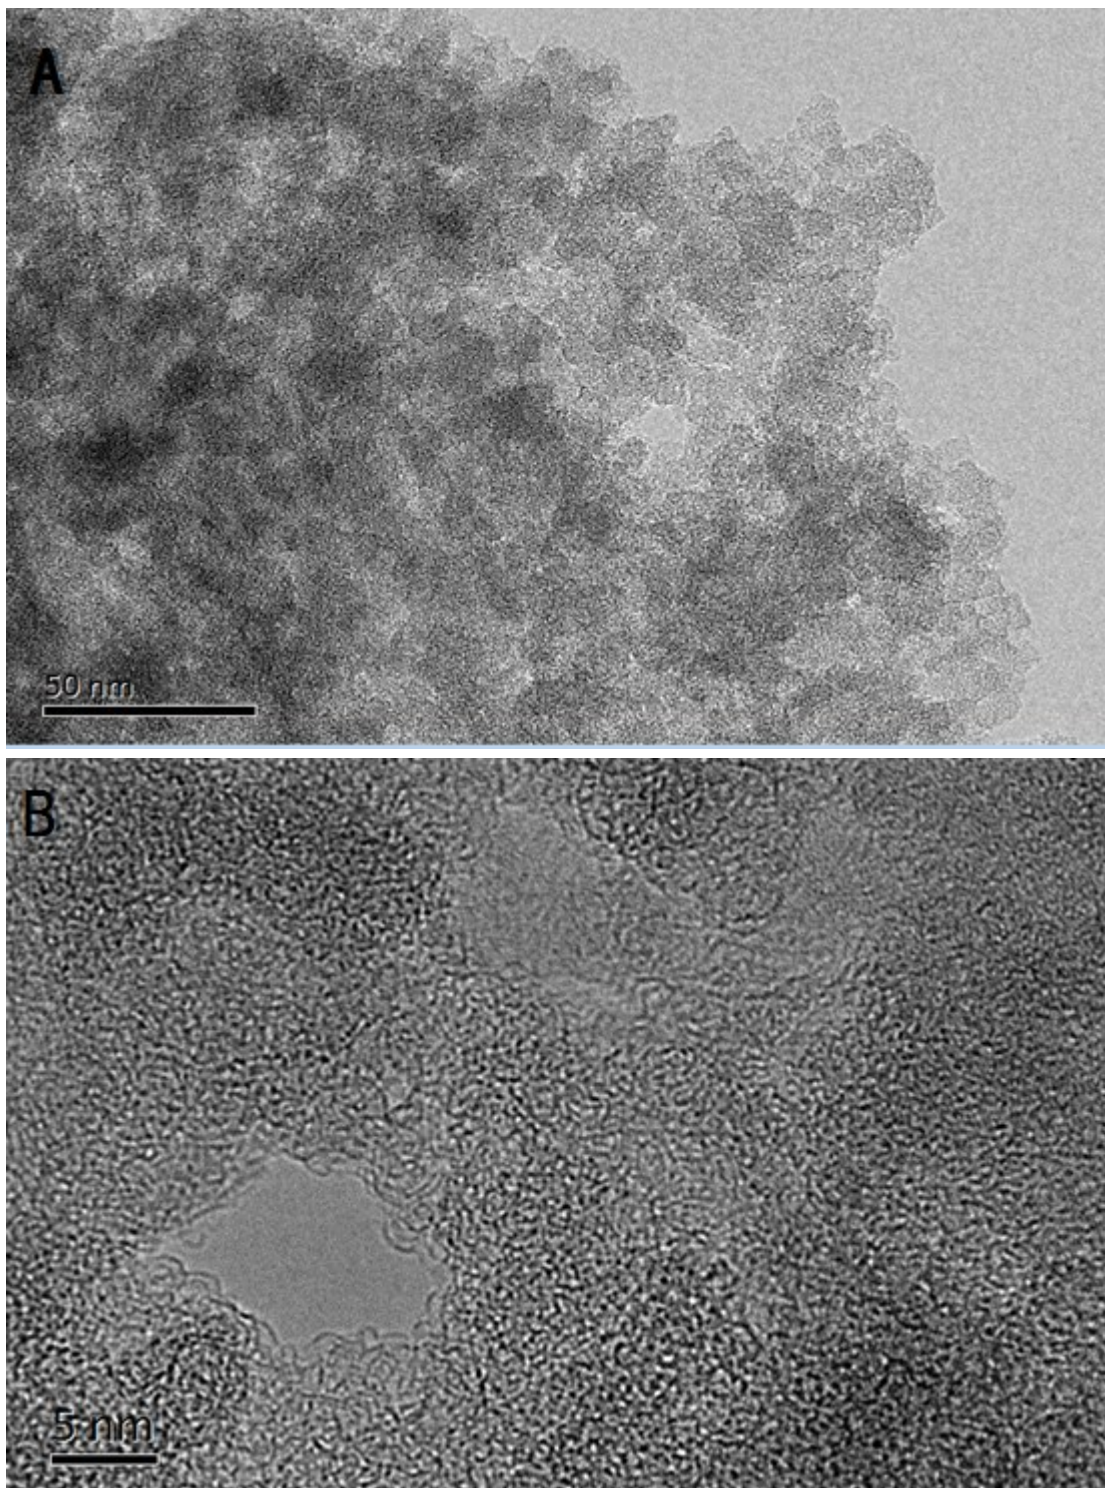

**Figure S7.** TEM images of Rh/CPOL-bp&PPh<sub>3</sub>.

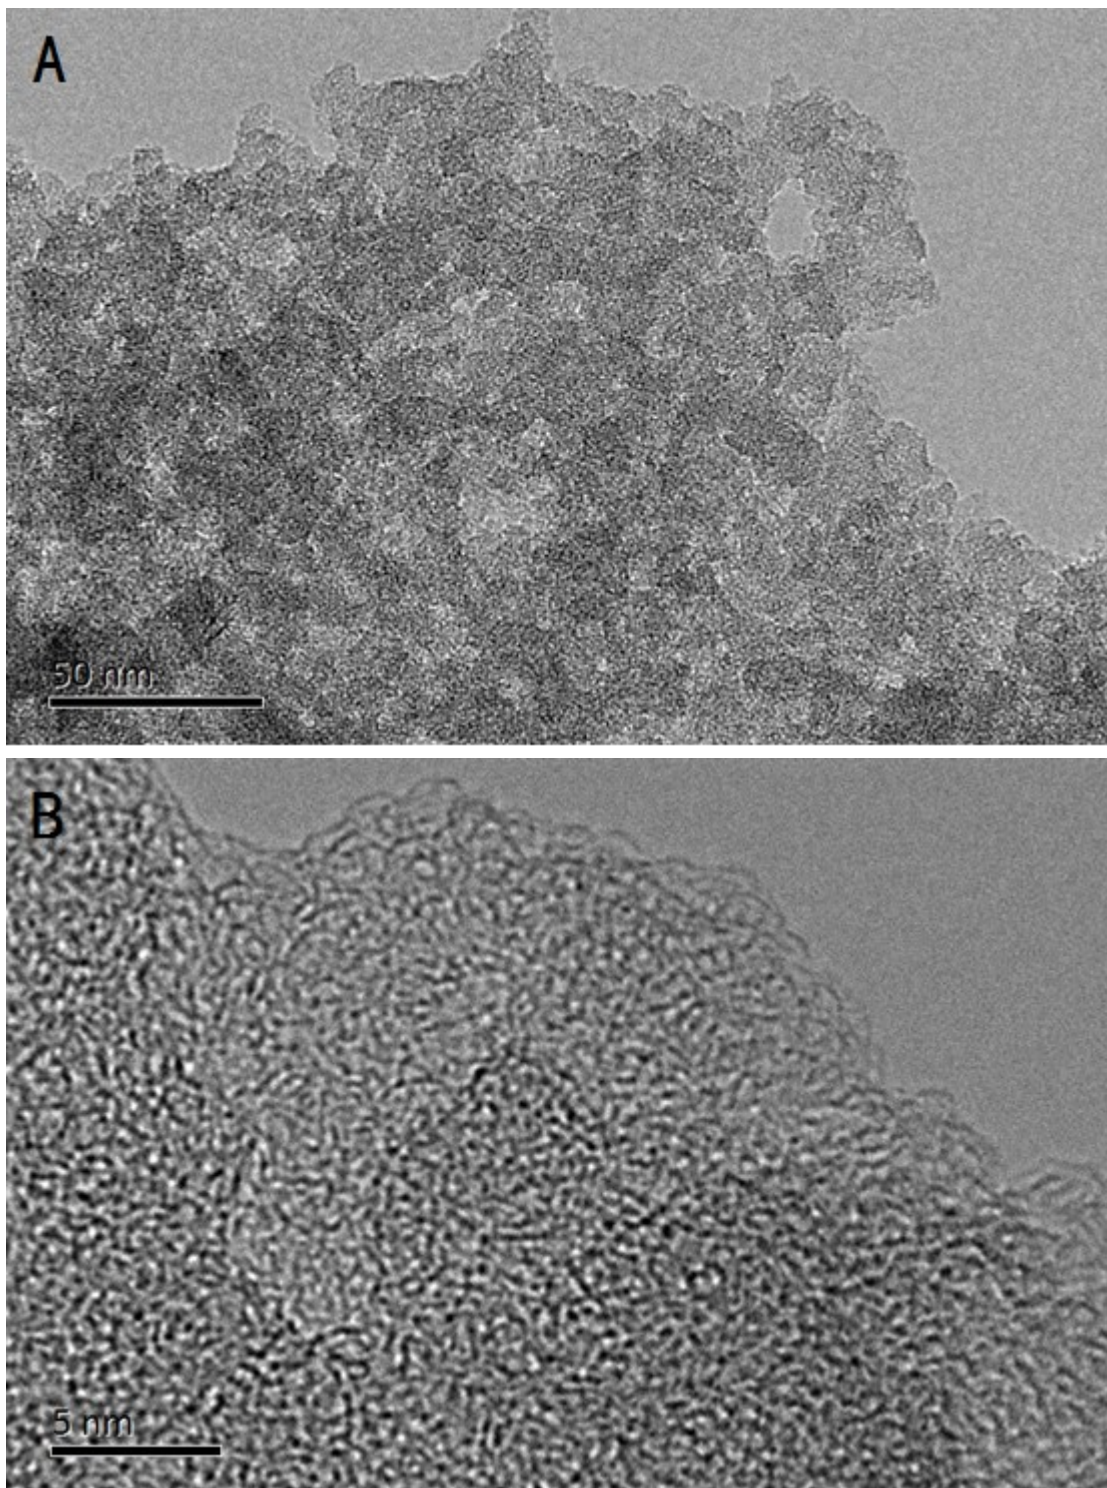

**Figure S8.** TEM images of Rh/CPOL-bp&PPh<sub>3</sub> after 6 runs.



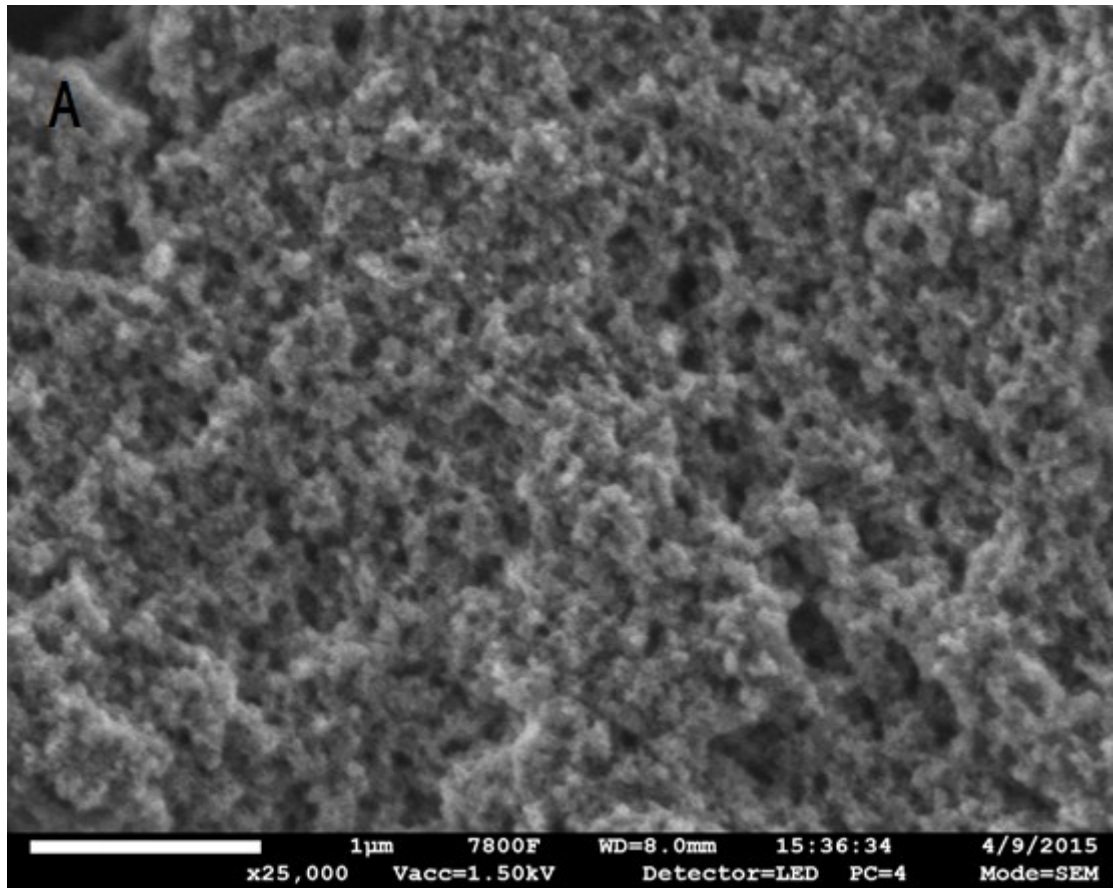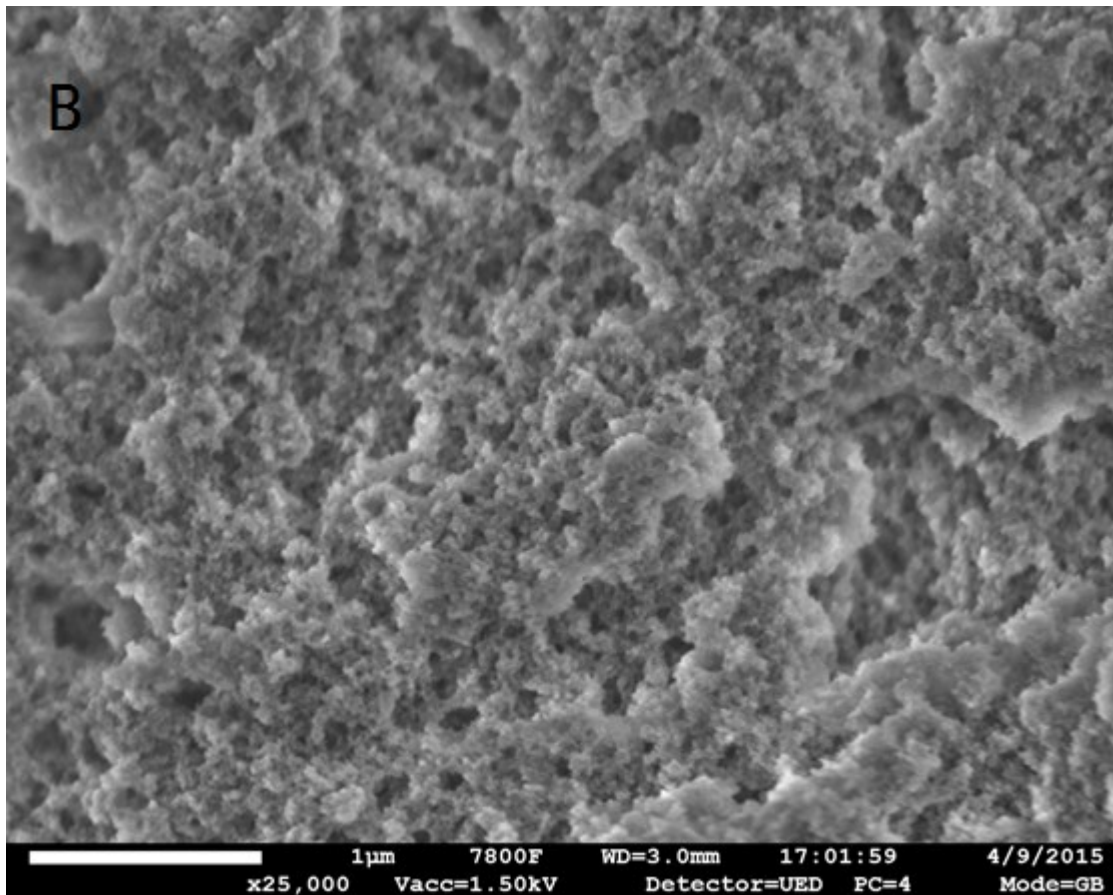

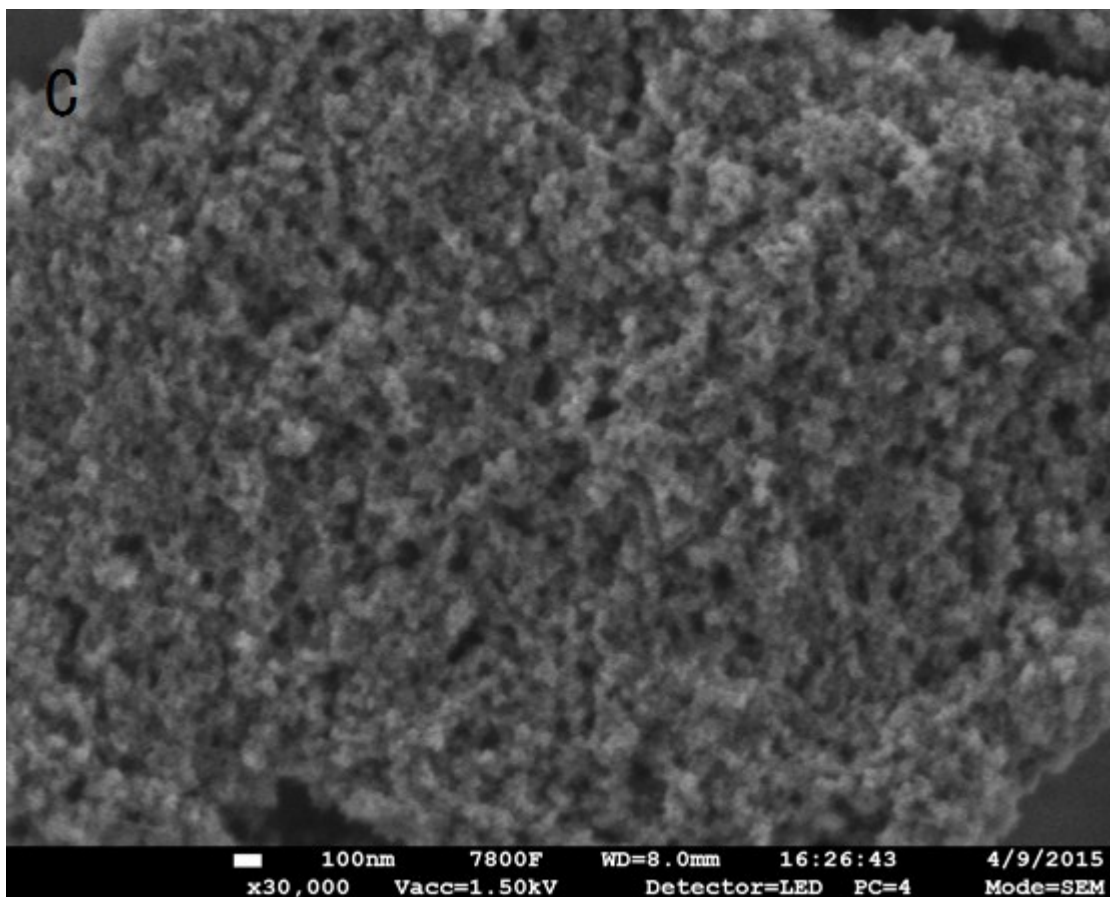

**Figure S9.** SEM images of (A) CPOL-bp&PPh<sub>3</sub>, (B) Rh/CPOL-bp&PPh<sub>3</sub> and (C) Rh/CPOL-bp&PPh<sub>3</sub> after 6 runs.

**Figure S9 shows that the all the samples have hierarchical porosity.**

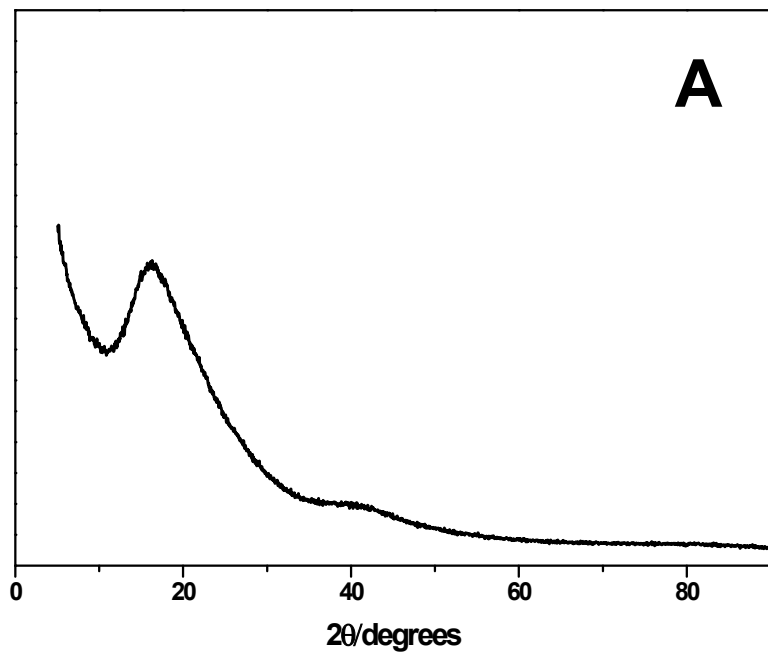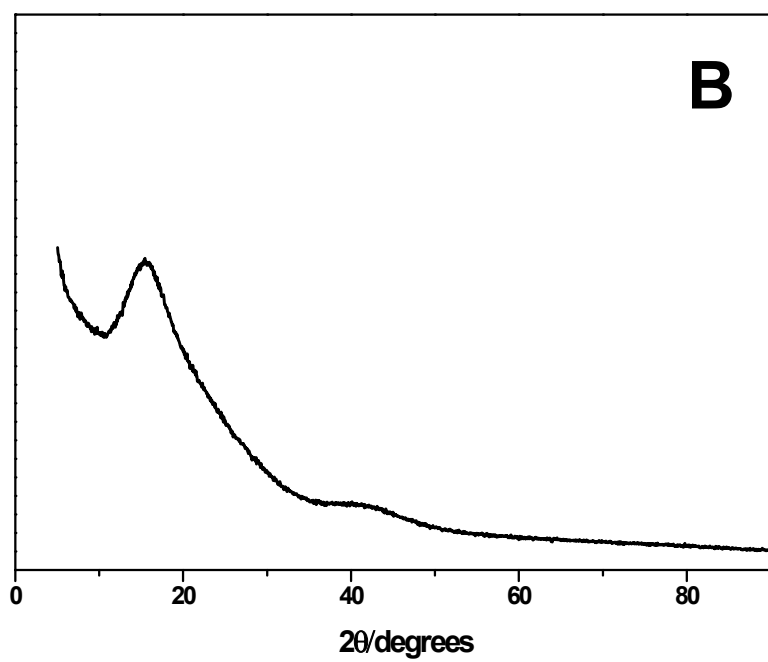

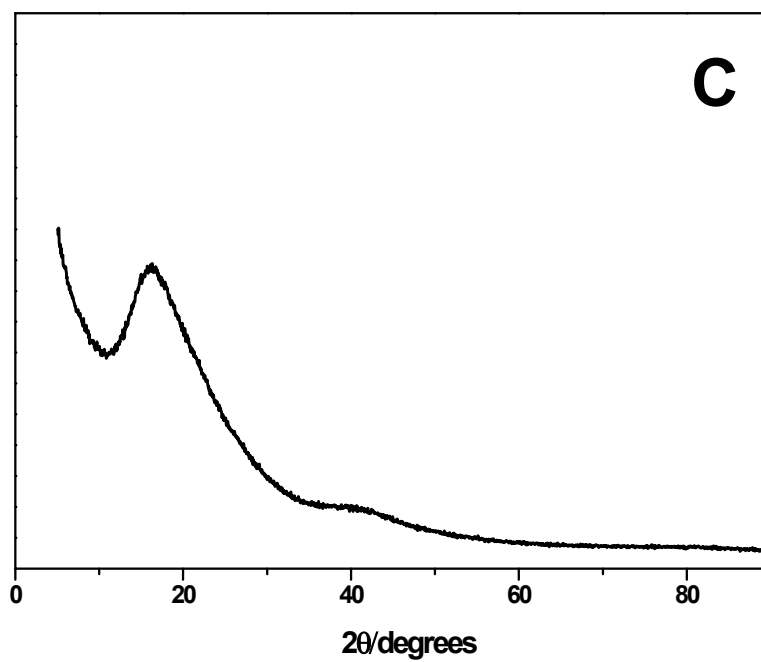

**Figure S10.** XRD of (A) CPOL-bp&PPh<sub>3</sub>, (B) Rh/CPOL-bp&PPh<sub>3</sub> and (C) Rh/CPOL-bp&PPh<sub>3</sub> after 6 runs.

**XRD also show that all three samples are amorphous.**

---

## 2. Supporting Tables

Table S1. Rh concentration of fresh and spend catalysts

| Sample                                             | Rh content(wt.%) <sup>a</sup> |
|----------------------------------------------------|-------------------------------|
| Rh/CPOL-bp&PPh <sub>3</sub> (fresh sample)         | 0.1385%                       |
| Rh/CPOL-bp&PPh <sub>3</sub> (spend sample, 6 runs) | 0.1340%                       |

<sup>a</sup> The lowest detectable limit of ICP-OES is 10<sup>-6</sup>, "85" and "40" in Rh content are untrusted data.

### 3. NMR characterizations of compounds in Scheme 1

#### Analytical data for compounds 1-7 and A, B

$^1\text{H}$  and  $^{13}\text{C}$  spectra were recorded on a 500 MHz spectrometer. Chemical shifts were reported in ppm.  $^1\text{H}$  NMR spectra were referenced to TMS in  $\text{CDCl}_3$  (0 ppm) or  $d_6$ -DMSO (0 ppm), and  $^{13}\text{C}$ -NMR spectra were referenced to  $\text{CDCl}_3$  (77.0 ppm) or  $d_6$ -DMSO (39.5 ppm). All  $^{13}\text{C}$ -NMR spectra were measured with complete proton decoupling except compound (A). Peak multiplicities were designated by the following abbreviations: s, singlet; d, doublet; t, triplet; m, multiplet; brs, broad singlet and J, coupling constant in Hz.

Mass spectroscopy were recorded on a Esquire 3000 Plus mass spectrometer. We were grateful to the assistance of the Department of Chemistry, Xiamen University in obtaining the MS data.

#### 5,5'-dimethoxy-3,3'-di-*tert*-butylbiphenyl-2,2'-diol (1)

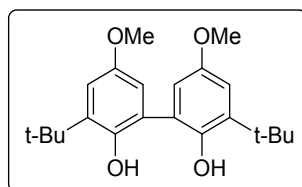

off-white powder, m.p. 220 °C;  $^1\text{H}$  NMR (400 MHz,  $\text{CDCl}_3$ )  $\delta$  1.43 (s, 9H), 3.77 (s, 3H), 5.04 (s, 1H), 6.62 (d, 1H,  $J = 3.0$  Hz), 6.96 (d, 1H,  $J = 3.0$  Hz);  $^{13}\text{C}$  NMR (100 MHz,  $\text{CDCl}_3$ )  $\delta$  29.5, 35.2, 55.7, 111.8, 115.3, 123.3, 138.9, 145.9, 153.2.

#### 3,3'-di-*tert*-butylbiphenyl-2,2',5,5'-tetraol (2)

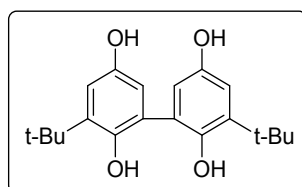

white chalky solid, m.p. 222 °C;  $^1\text{H}$  NMR (400 MHz,  $\text{DMSO}-d_6$ )  $\delta$  1.36 (s, 9H), 6.49 (d, 1H,  $J = 2.9$  Hz), 6.68 (d, 1H,  $J = 2.9$  Hz), 8.39 (s, 1H), 8.86 (s, 1H);  $^{13}\text{C}$  NMR (100 MHz,  $\text{DMSO}-d_6$ )  $\delta$  30.3, 35.1, 113.6, 115.4, 131.6, 140.8, 144.1, 151.4.

#### 5,5'-di-*tert*-butyl-6,6'-dihydroxybiphenyl-3,3'-diyl bis(trifluoromethanesulfonate) (3)

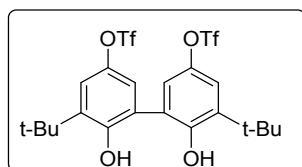

Gummy liquid;  $^1\text{H}$  NMR (500 MHz,  $\text{CDCl}_3$ )  $\delta$  1.45 (s, 9H), 5.44 (s, 1H), 7.04 (d, 1H,  $J = 3.1$  Hz), 7.30 (d, 1H,  $J = 3.1$  Hz);  $^{13}\text{C}$  NMR (125 MHz,  $\text{CDCl}_3$ )  $\delta$  29.2, 35.5, 118.8 (q,  $J = 320.0$  Hz), 121.2, 121.8, 122.5, 140.6, 142.9, 151.7.



6,6'-diacetate-5,5'-di-*tert*-butylbiphenyl-3,3'-diyl bis(trifluoromethanesulfonate) (4)

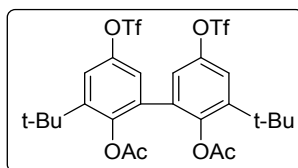

a white solid, m.p. 109 °C;  $^1\text{H NMR}$  (400 MHz,  $\text{CDCl}_3$ )  $\delta$  1.38 (s, 9H), 1.85 (s, 3H), 7.06 (d, 1H,  $J = 2.9$  Hz), 7.36 (d, 1H,  $J = 3.1$  Hz);  $^{13}\text{C NMR}$  (100 MHz,  $\text{CDCl}_3$ )  $\delta$  20.4, 29.9, 35.2, 118.8 (q,  $J = 321.0$  Hz), 120.9, 122.4, 133.6, 144.9, 146.4, 146.6, 167.9.

3,3'-di-*tert*-butyl-5,5'-divinylbiphenyl-2,2'-diyl diacetate (5)

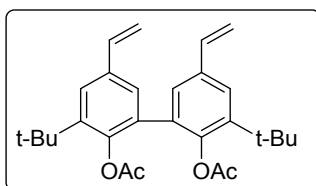

a white solid, m.p. 118 °C;  $^1\text{H NMR}$  (500 MHz,  $\text{CDCl}_3$ )  $\delta$  1.38 (s, 9H), 1.84 (s, 3H), 5.22 (d, 1H,  $J = 11.2$  Hz), 5.70 (dd, 1H,  $J_1 = 17.6$  Hz,  $J_2 = 0.6$  Hz), 6.70 (dd, 1H,  $J_1 = 17.6$  Hz,  $J_2 = 10.9$  Hz), 7.24 (d, 1H,  $J = 1.9$  Hz), 7.41 (d, 1H,  $J = 2.1$  Hz);  $^{13}\text{C NMR}$  (100 MHz,  $\text{CDCl}_3$ )  $\delta$  20.8, 30.4, 34.7, 114.0, 125.0, 127.9, 133.4, 135.4, 136.4, 141.3, 146.4, 168.6.

3,3'-di-*tert*-butyl-5,5'-divinylbiphenyl-2,2'-diol (6)

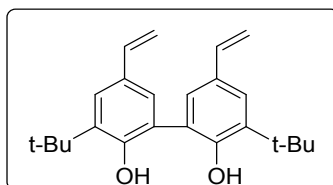

a white solid, m.p. 55 °C;  $^1\text{H NMR}$  (500 MHz,  $\text{CDCl}_3$ )  $\delta$  1.45 (s, 9H), 5.14 (d, 1H,  $J = 10.9$  Hz), 5.30 (s, 1H), 5.62 (d, 1H,  $J = 17.6$  Hz), 6.66 (dd, 1H,  $J_1 = 17.6$  Hz,  $J_2 = 11.0$  Hz), 7.16 (d, 1H,  $J = 1.8$  Hz), 7.42 (d, 1H,  $J = 1.6$  Hz);  $^{13}\text{C NMR}$  (125 MHz,  $\text{CDCl}_3$ )  $\delta$  29.5, 35.0, 112.0, 122.5, 126.2, 126.3, 130.2, 136.3, 137.3, 152.0.

2,2'-bisphenoxyphosphorus chloride (7)

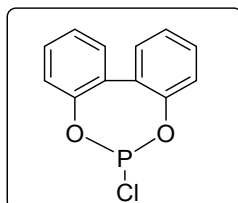

yellow liquid;  $^1\text{H NMR}$  (400 MHz,  $\text{CDCl}_3$ )  $\delta$  7.20 (d, 2H,  $J = 7.9$  Hz), 7.31 (t, 2H,  $J = 7.4$  Hz), 7.37 (td, 2H,  $J_1 = 7.7$  Hz,  $J_2 = 1.6$  Hz), 7.46 (dd, 2H,  $J_1 = 7.5$  Hz,  $J_2 = 1.6$  Hz);  $^{13}\text{C NMR}$  (100 MHz,  $\text{CDCl}_3$ )  $\delta$  122.2 (d,  $J = 1.9$  Hz), 126.2, 129.4, 130.1, 130.9 (d,  $J = 3.5$  Hz), 149.2 (d,  $J = 5.7$  Hz);  $^{31}\text{P NMR}$  (161.8 MHz,  $\text{CDCl}_3$ )  $\delta$  179.4.

6,6'-(3,3'-di-tert-butyl-5,5'-divinylbiphenyl-2,2' diyl)bis(oxy)didibenzo [1,3,2]dioxaphosphepine (A)

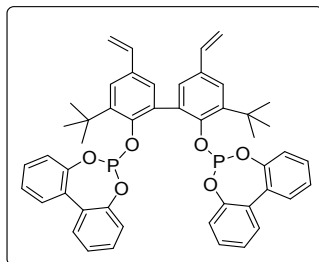

a white solid, m.p. 185 °C;  $^1\text{H NMR}$  (400 MHz,  $\text{CDCl}_3$ )  $\delta$  1.32 (s, 9H), 5.24 (dd, 1H,  $J_1 = 10.9$  Hz,  $J_2 = 0.5$  Hz), 5.74 (dd, 1H,  $J_1 = 17.6$  Hz,  $J_2 = 0.5$  Hz), 6.75 (dd, 1H,  $J_1 = 17.6$  Hz,  $J_2 = 10.9$  Hz), 6.72 (d, 1H,  $J = 7.6$  Hz), 7.01 (td, 1H,  $J_1 = 7.9$  Hz,  $J_2 = 1.3$  Hz), 7.10-7.15 (m, 2H), 7.23 (td, 1H,  $J_1 = 7.5$  Hz,  $J_2 = 1.2$  Hz), 7.29 (td, 1H,  $J_1 = 7.8$  Hz,  $J_2 = 1.8$  Hz), 7.35 (dd, 1H,  $J_1 = 7.7$  Hz,  $J_2 = 1.6$  Hz), 7.39-7.44 (m, 2H), 7.54 (d, 1H,  $J = 2.3$  Hz);  $^{13}\text{C NMR}$  (100 MHz,  $\text{CDCl}_3$ )  $\delta$  30.4, 35.3, 113.4, 122.3, 123.1, 124.8, 124.9, 126.1, 128.7, 128.8, 129.4, 129.6, 129.8, 131.2, 131.3, 131.5, 132.5, 136.4, 141.9, 149.0, 149.7, 150.2;  $^{31}\text{P NMR}$  (161.8 MHz,  $\text{CDCl}_3$ )  $\delta$  144.5; **HRMS** (ESI):m/z calc. for  $\text{C}_{48}\text{H}_{44}\text{O}_6\text{P}_2$   $[\text{M}+\text{H}]^+$ :779.2686, found:779.2697.

tris(4-vinphenyl)phosphane (B)

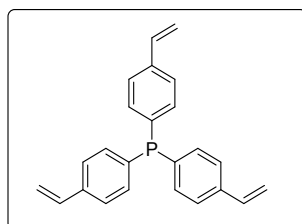

a white solid, m.p. 75 °C;  $^1\text{H NMR}$  (400 MHz,  $\text{CDCl}_3$ )  $\delta$  5.26 (d, 1H,  $J = 11.1$  Hz), 5.76 (d, 1H,  $J = 17.5$  Hz), 6.69 (dd, 1H,  $J_1 = 17.6$  Hz,  $J_2 = 10.9$  Hz), 7.25-7.29 (m, 2H), 7.35-7.37 (m, 2H);  $^{13}\text{C NMR}$  (100 MHz,  $\text{CDCl}_3$ )  $\delta$  114.7, 126.3 (d, 6C,  $J = 7.0$  Hz), 133.8 (d, 3C,  $J = 19.4$  Hz), 136.3, 136.6 (d, 6C,  $J = 10.8$  Hz), 137.9;  $^{31}\text{P NMR}$  (161.8 MHz,  $\text{CDCl}_3$ )  $\delta$  -6.8;

**NMR spectra of compounds 1-7 and A, B**

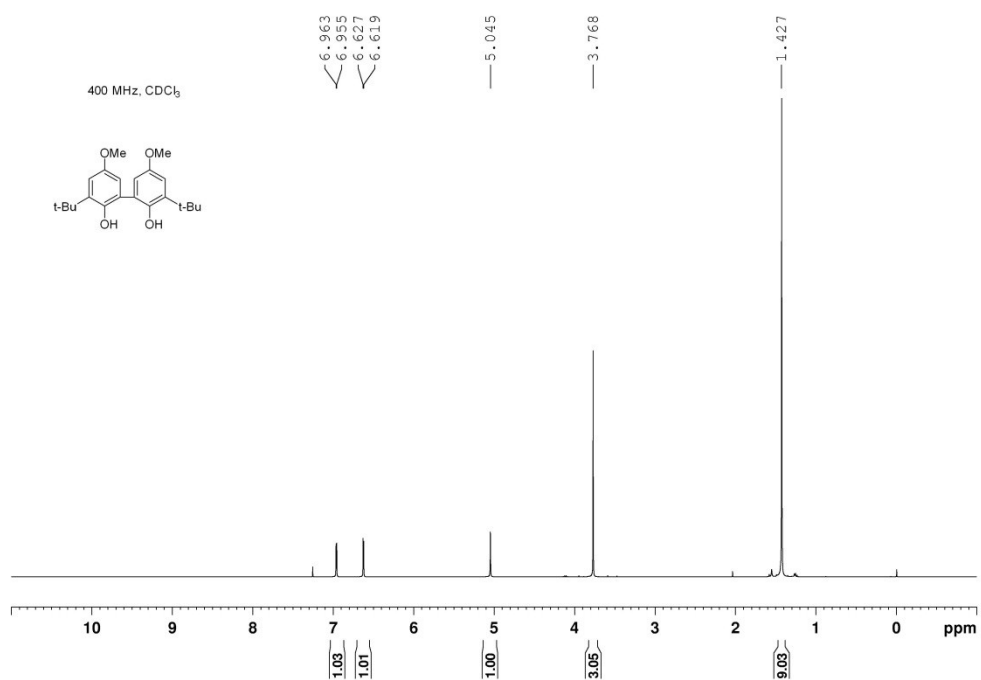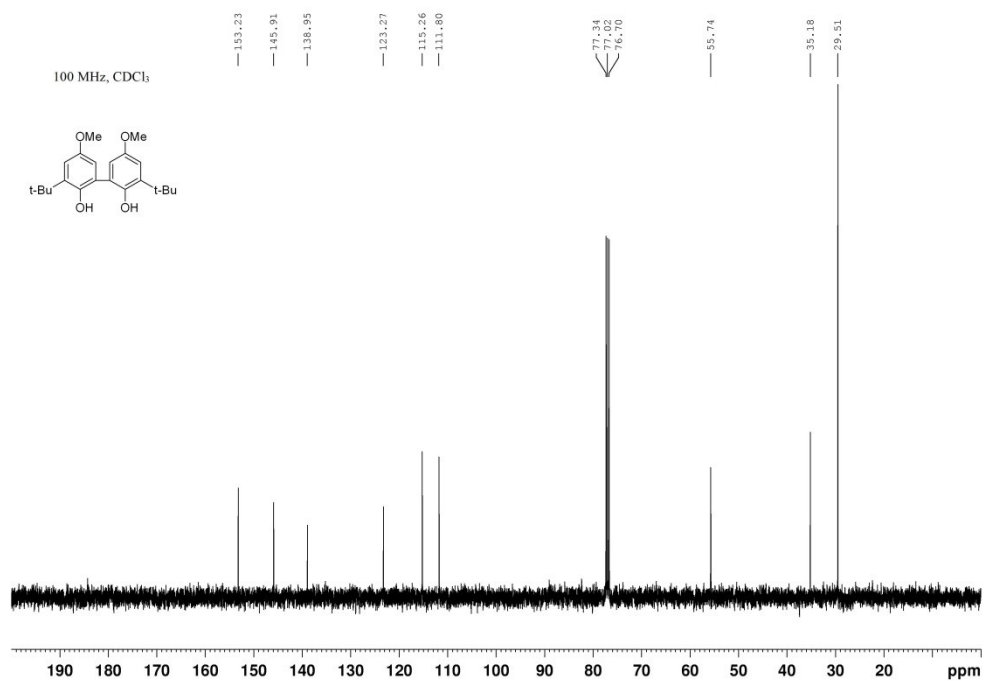

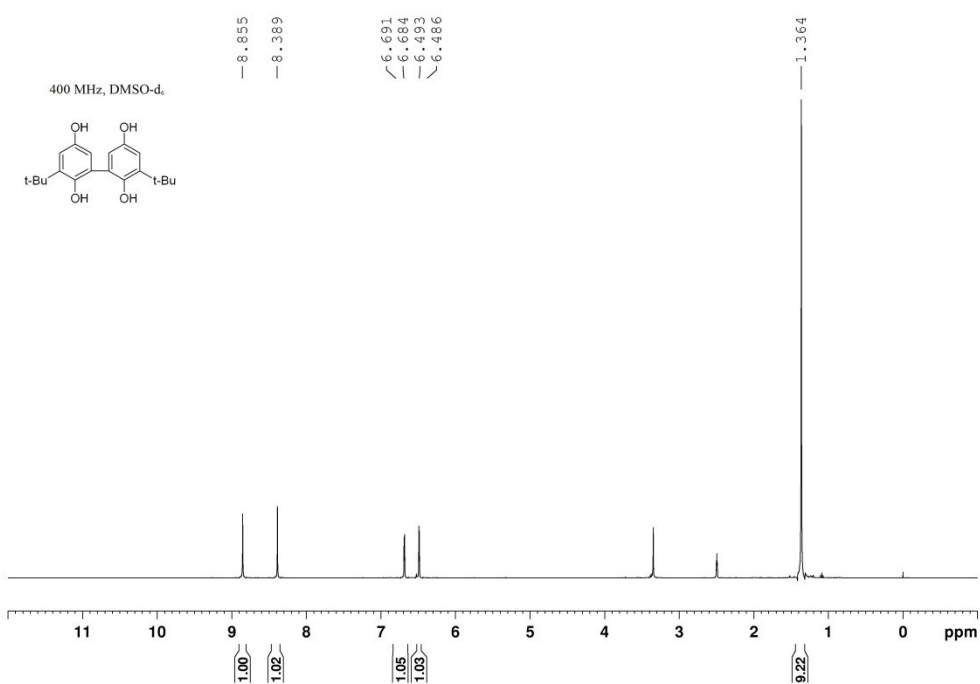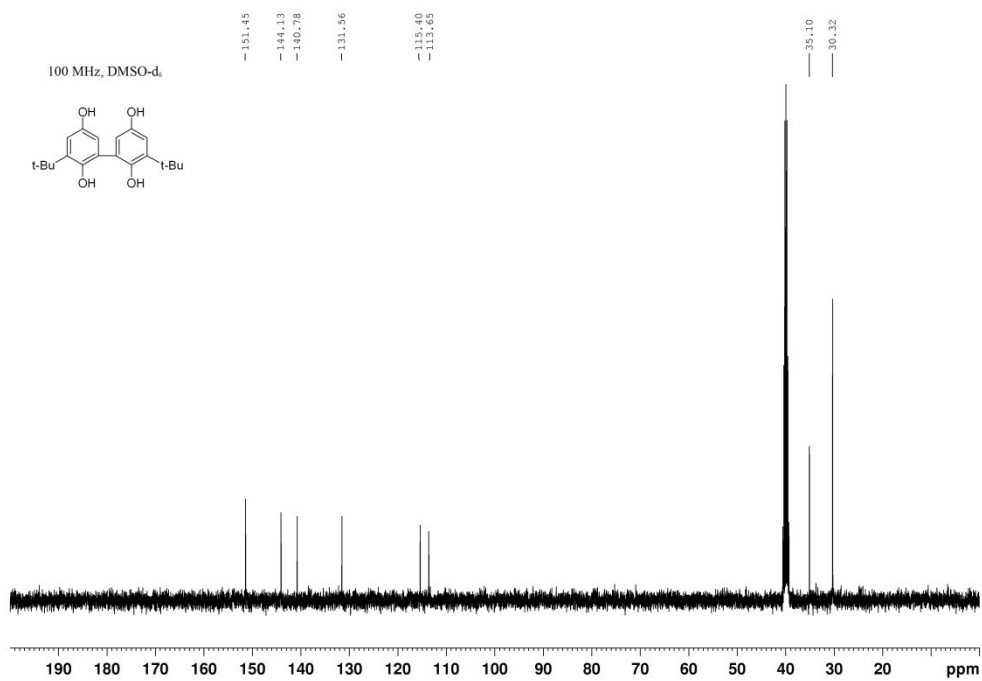

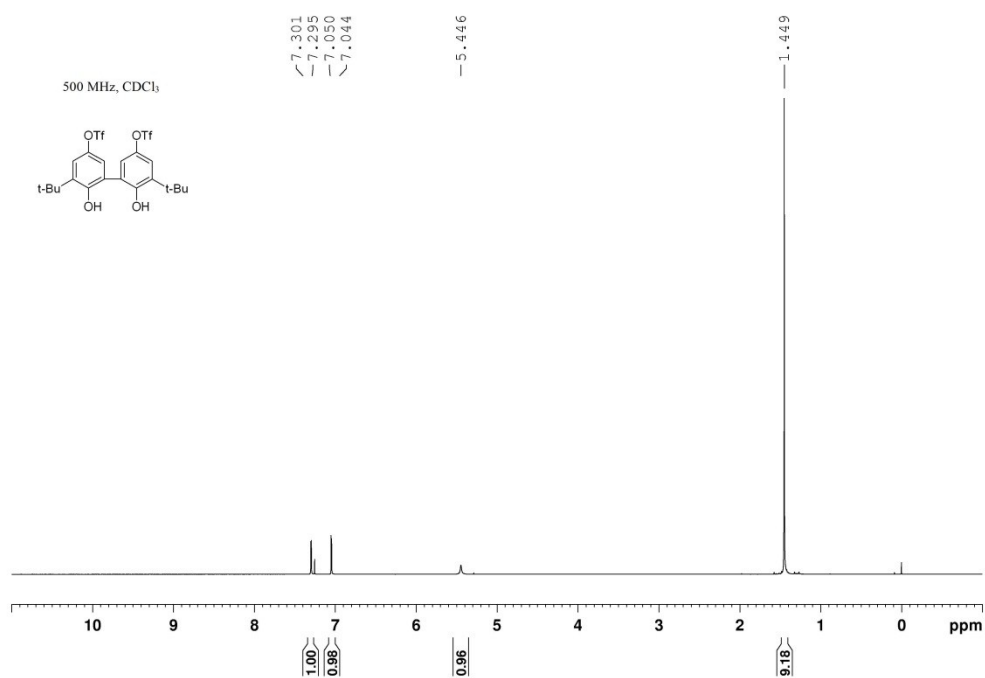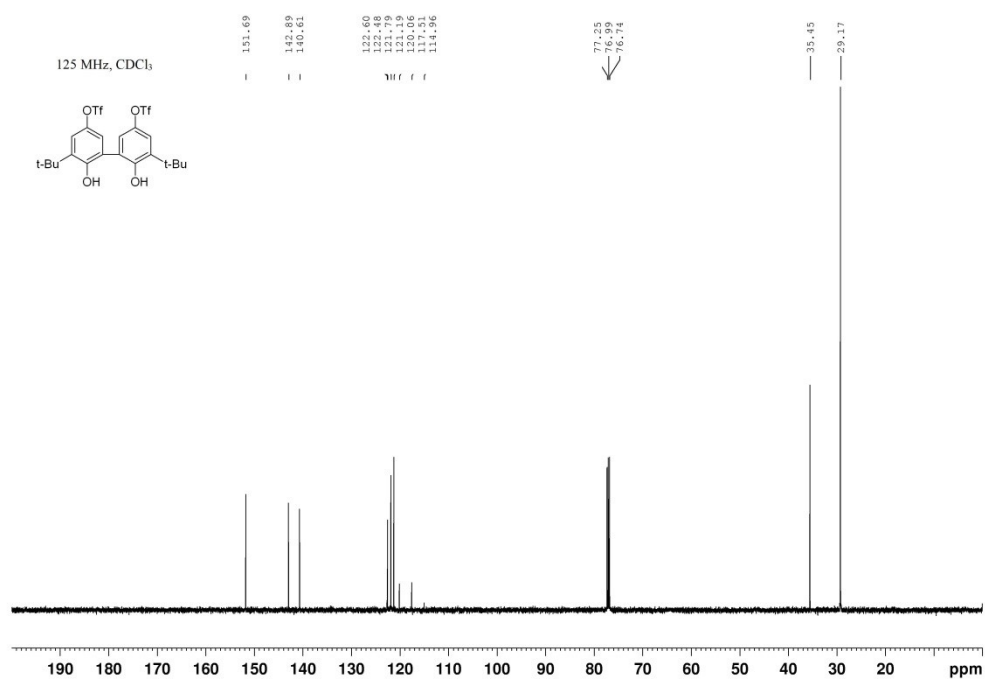

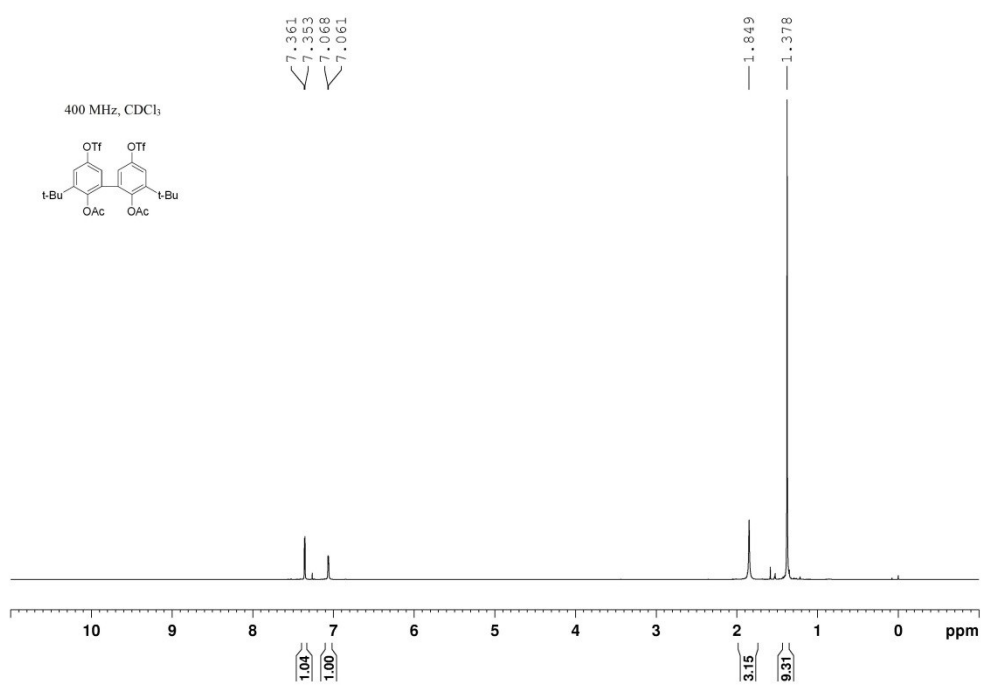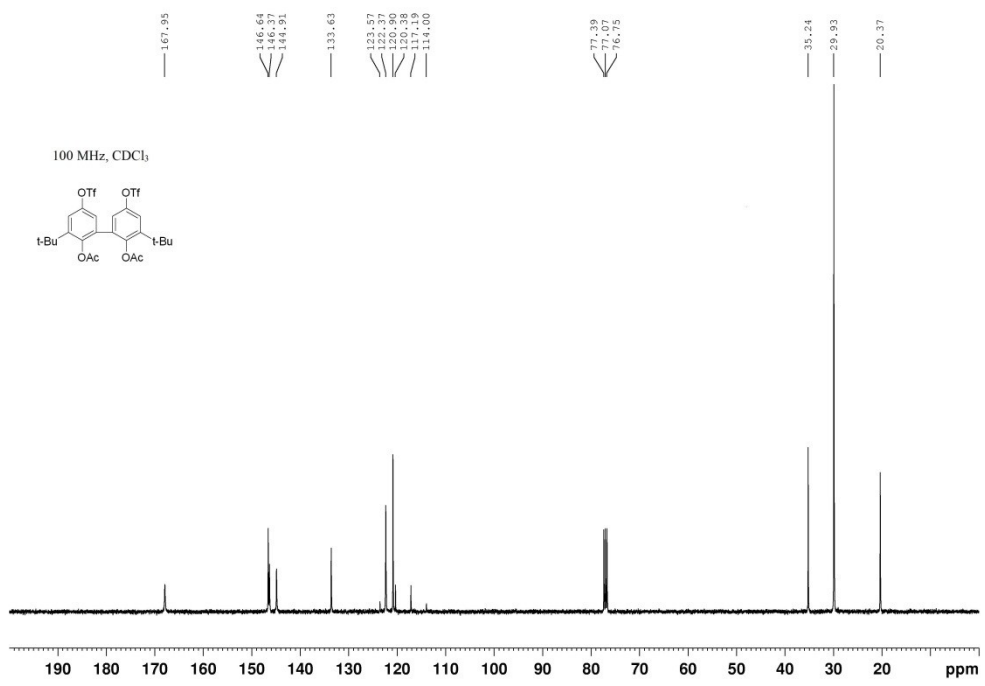

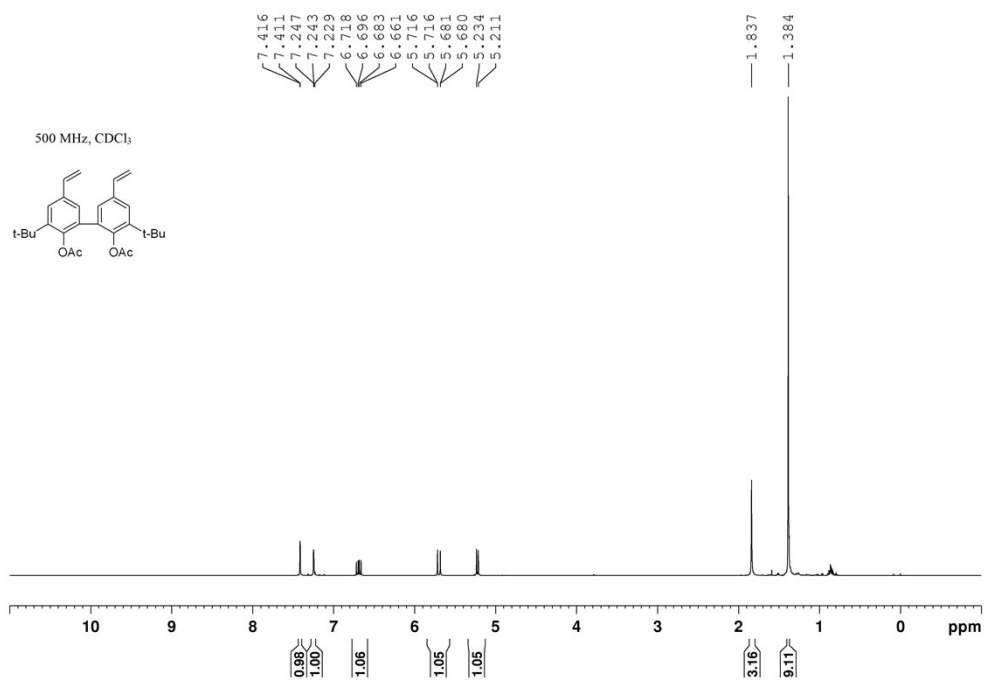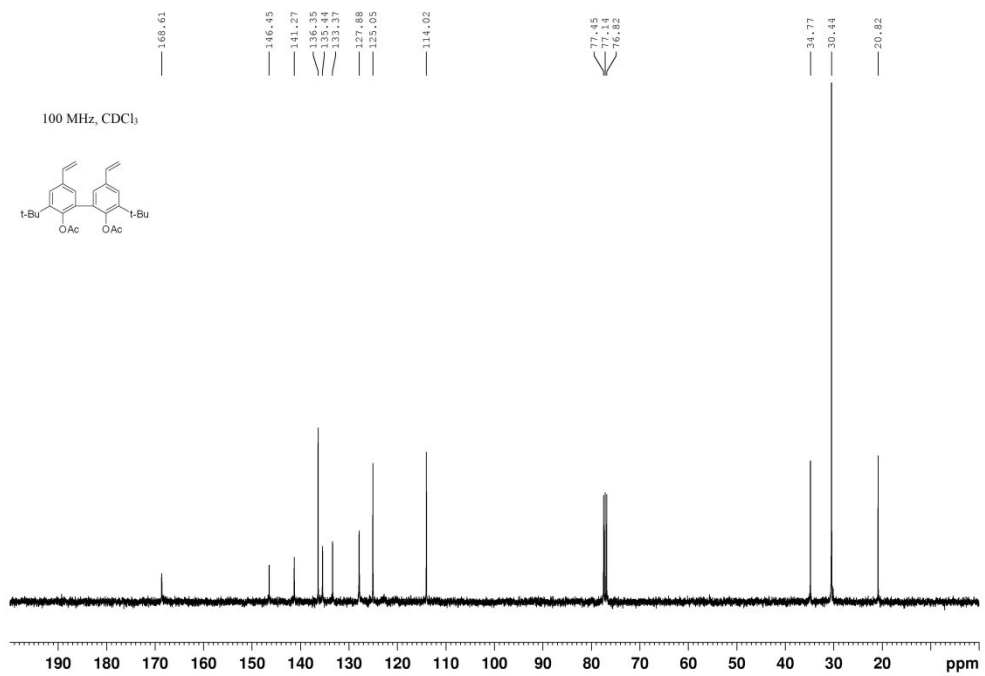

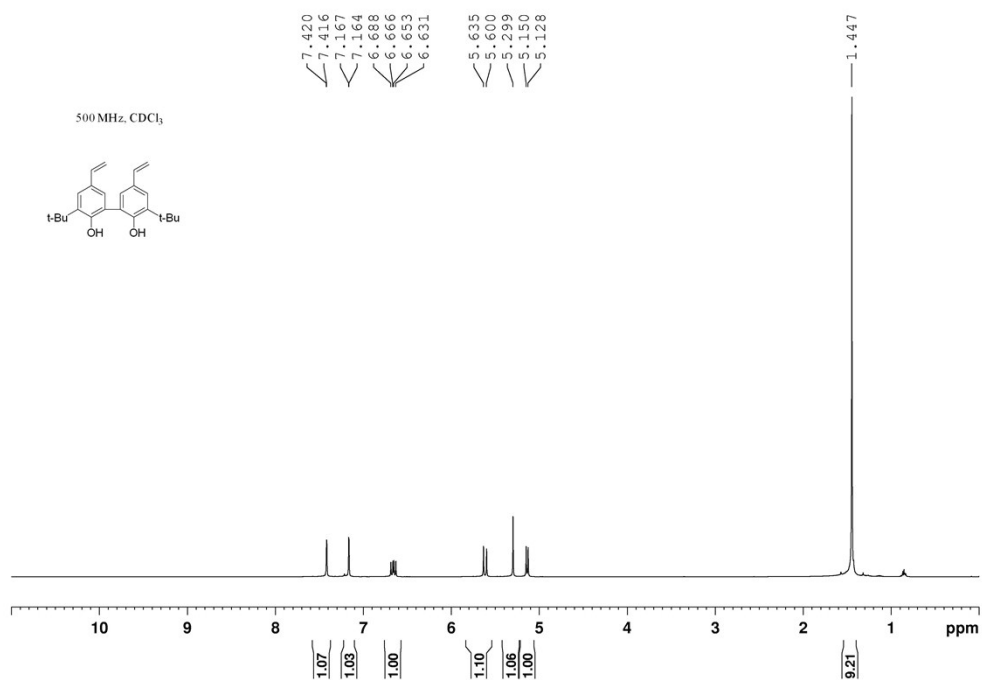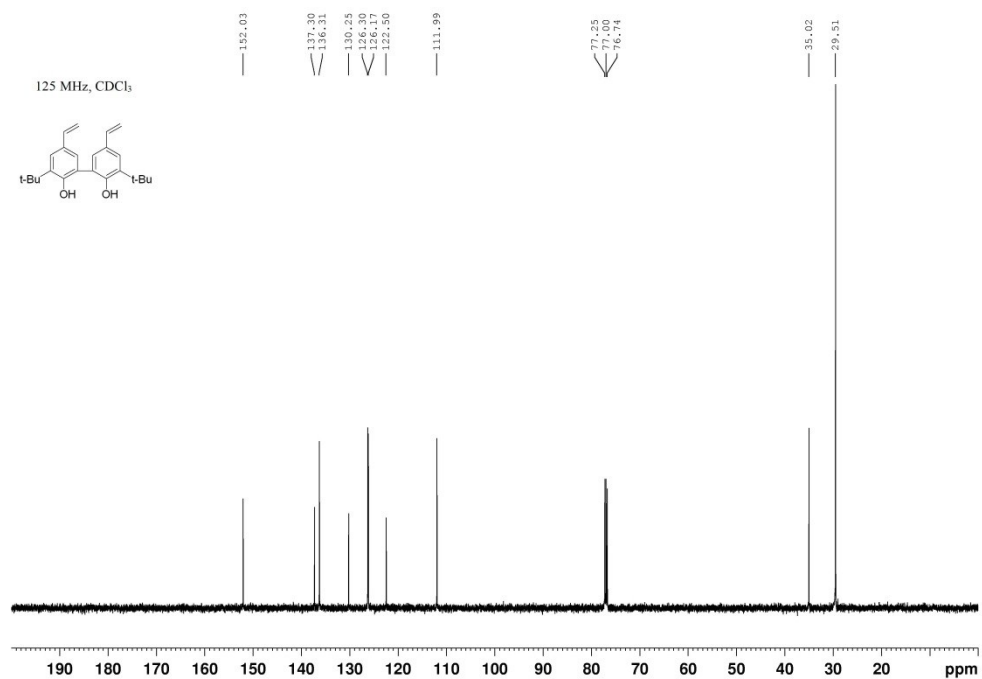



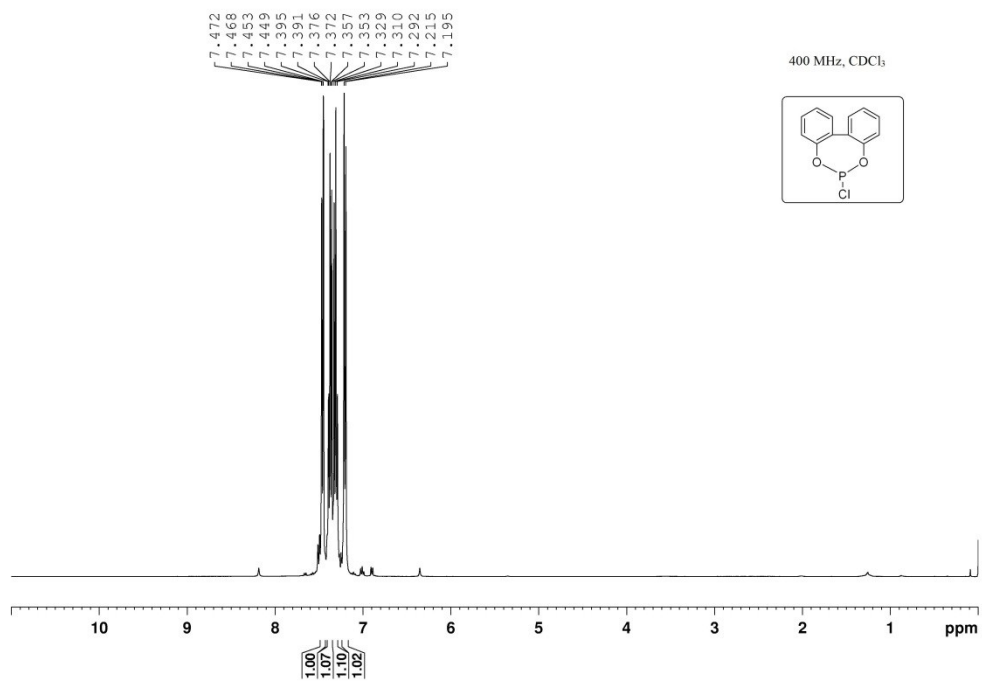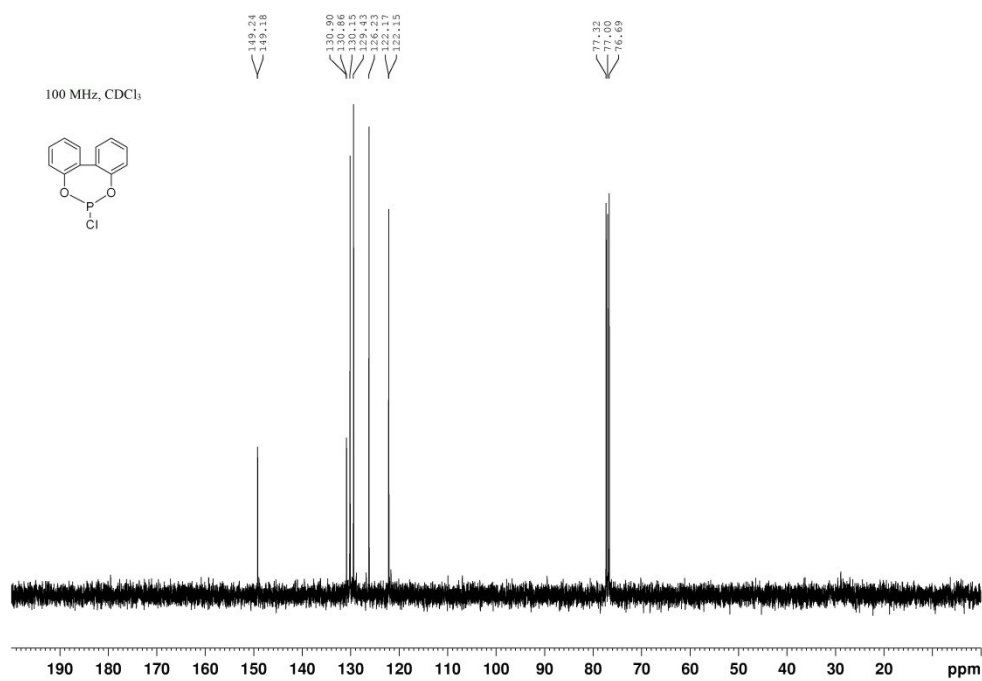

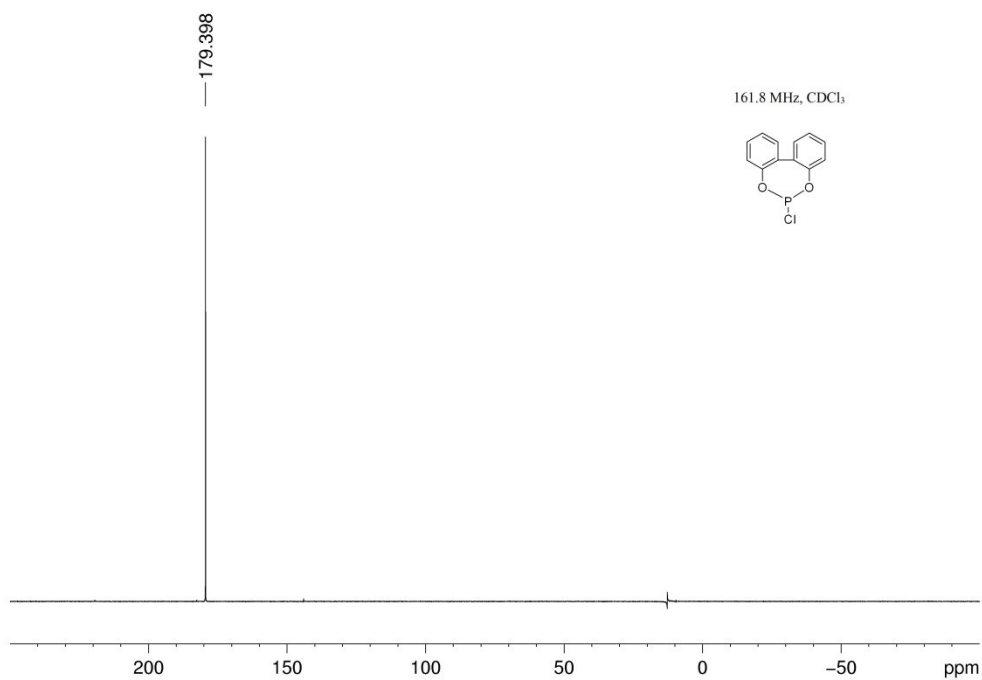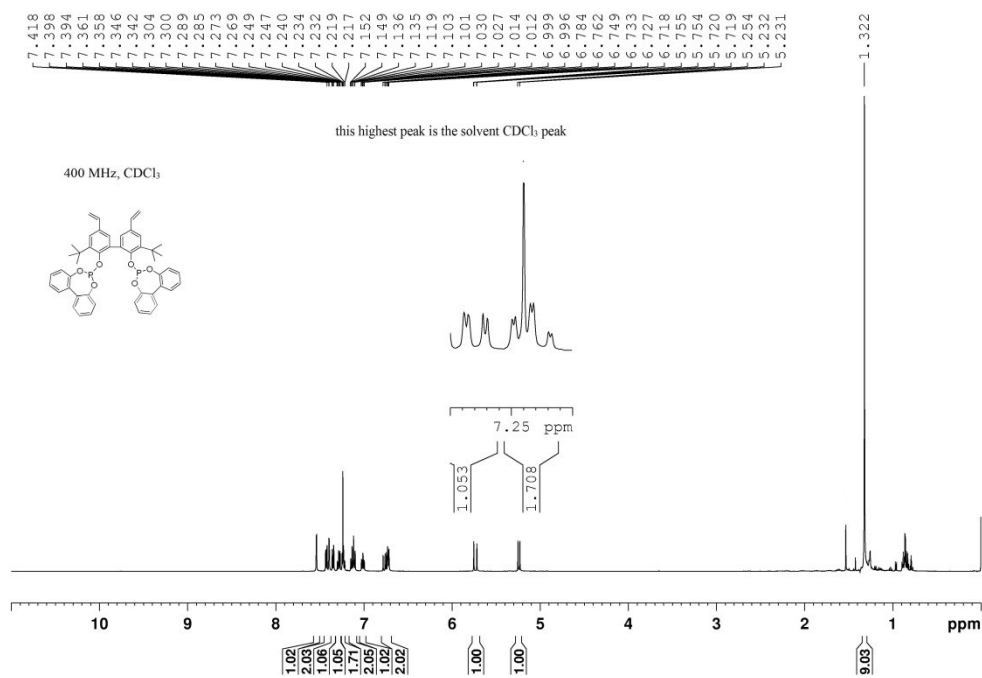

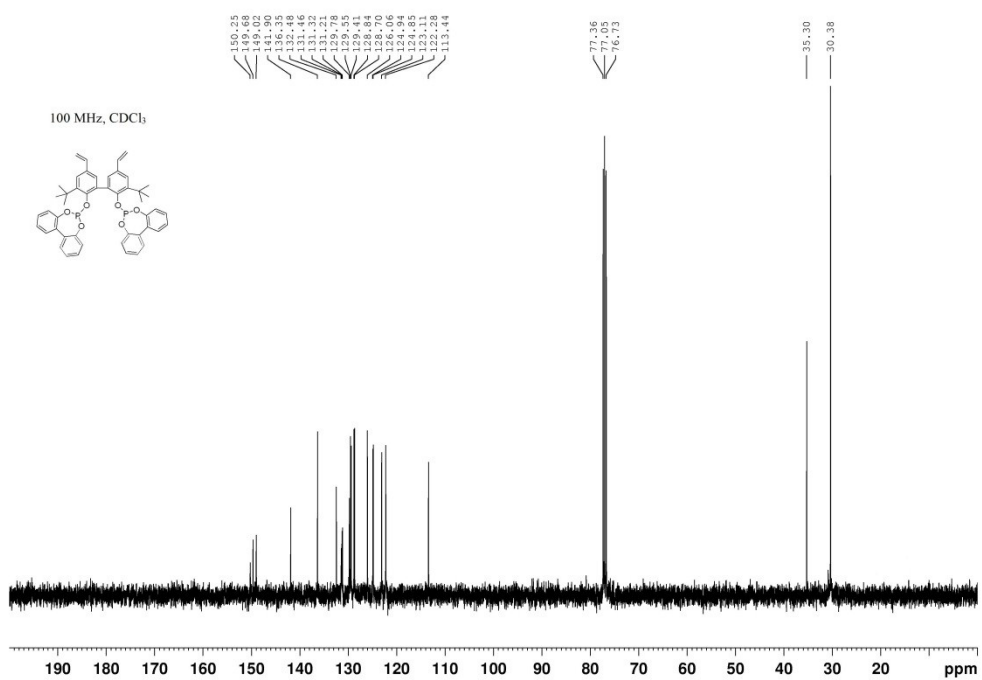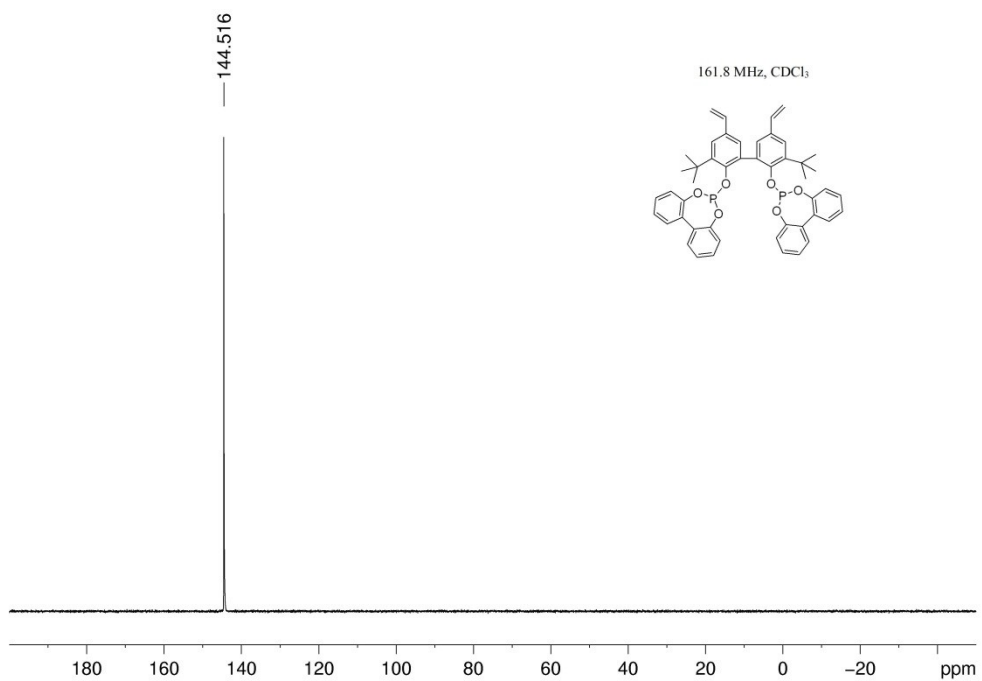

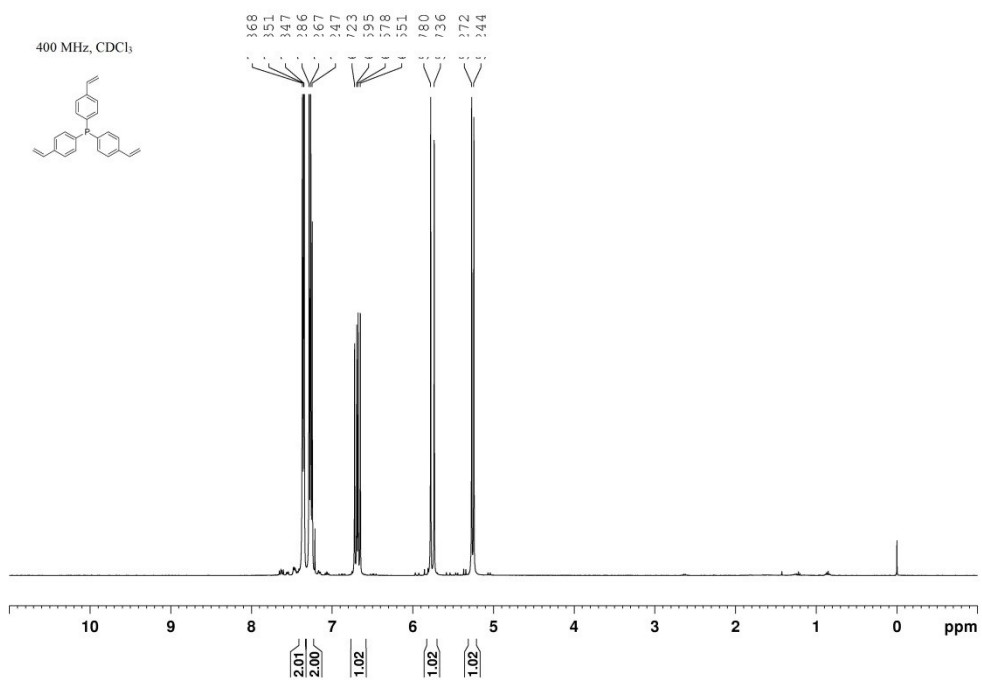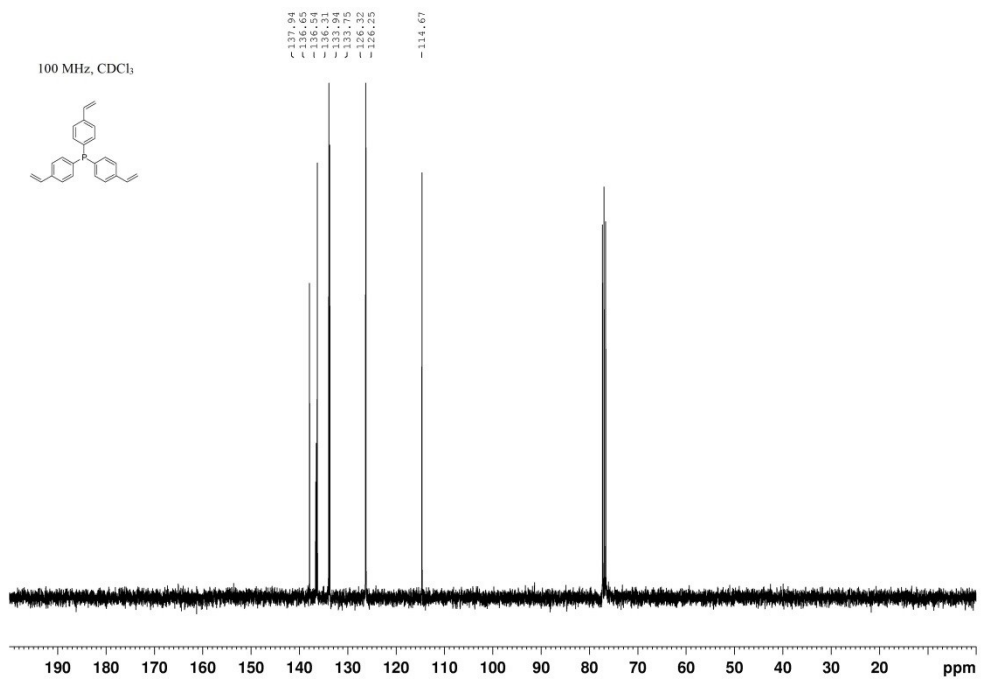

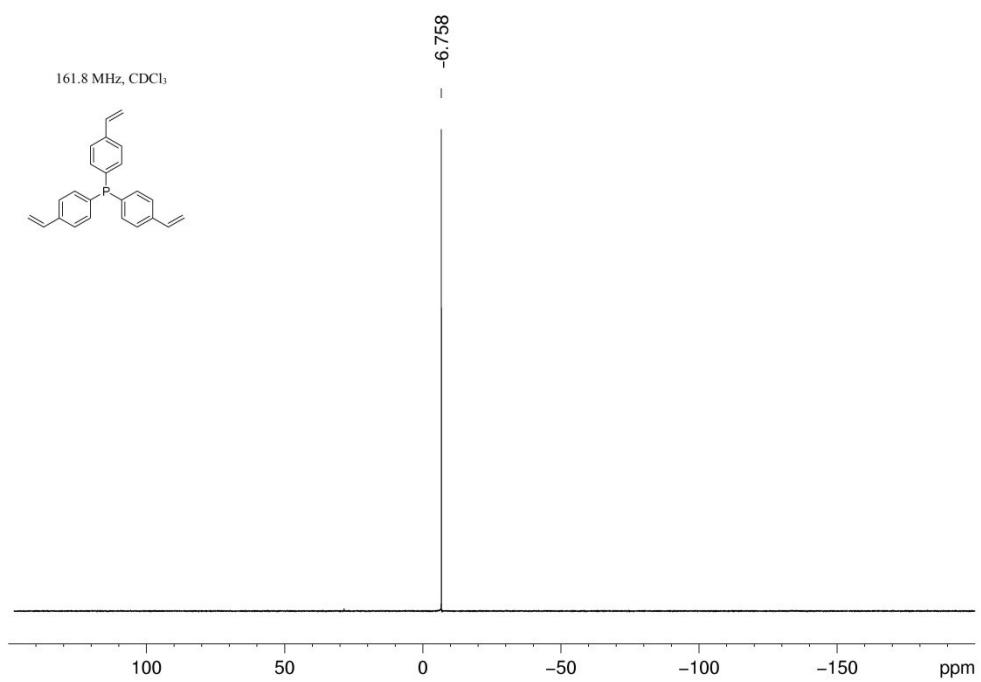

Supplement: c5cy01655j1.pdf [file c5cy01655j1.pdf]
